# Supplementary material for: Mitogenome Architecture and Evolutionary Insights in Origanum vulgare: Comparative Analysis of Structural Diversity and Repeat-Mediated Recombination
Source: Research Square preprint supplement (doi:10.21203/rs.3.rs-7070486/v1), 2025-07-24

**Figure S1 | HiFi Read Statistics for *O. vulgare* Mitogenome Sequencing.** (A) Distribution of HiFi read lengths. (B) Distribution of predicted read quality (Q score) across HiFi reads.

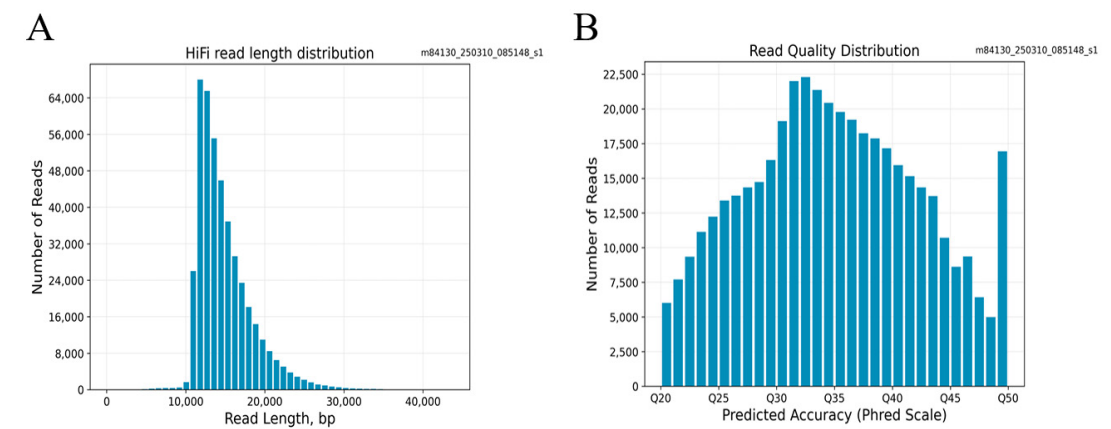

Supplement: Supplementary file 1 [file 0e391f53021c66522e766a75.pdf]
