# Supplementary material for: Mitogenome Architecture and Evolutionary Insights in Origanum vulgare: Comparative Analysis of Structural Diversity and Repeat-Mediated Recombination
Source: Research Square preprint supplement (doi:10.21203/rs.3.rs-7070486/v1), 2025-07-24
Supplement: Supplementary file 1 [file 19960acaa12f60b7a37a9a68.docx]

**Table S1 | Primer sequences and PCR conditions for target gene amplification.**

| **Gene** | **Primers** | **Product length (bp)** | **Sequence 5’-3’** | **PCR procedure** |
| --- | --- | --- | --- | --- |
| *rbcL* | rbcL-F | 599 | ATGTCACCACAAACAGAGACTAAAGC | 95℃ 3 min;  94℃ 15s, 53℃ 30s, 72℃ 1 min (35 cycles);  72℃ 5 min |
| rbcL-R | GTAAAATCAAGTCCACCGCG |
| *matK* | matK-F | 966 | CGTACAGTACTTTTGTGTTTACGAG |
| matK-R | TAATTTACGATCAATTCATTC |
