# Supplementary material for: Mitogenome Architecture and Evolutionary Insights in Origanum vulgare: Comparative Analysis of Structural Diversity and Repeat-Mediated Recombination
Source: Research Square preprint supplement (doi:10.21203/rs.3.rs-7070486/v1), 2025-07-24

**Figure S5 | Comparative genomic analysis of *O. vulgare* and related species.** Panel (A) displays dot plots comparing the mitogenomic sequence of *O. vulgare* against *P. chinense*. Panel (B) presents dot plots comparing the mitogenomic sequence of *O. vulgare* against *S. rosmarinus*.

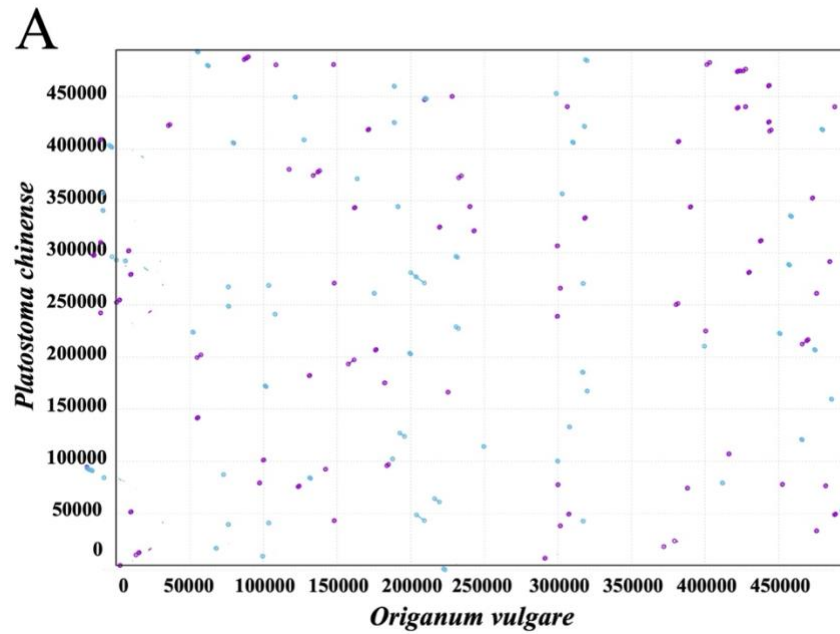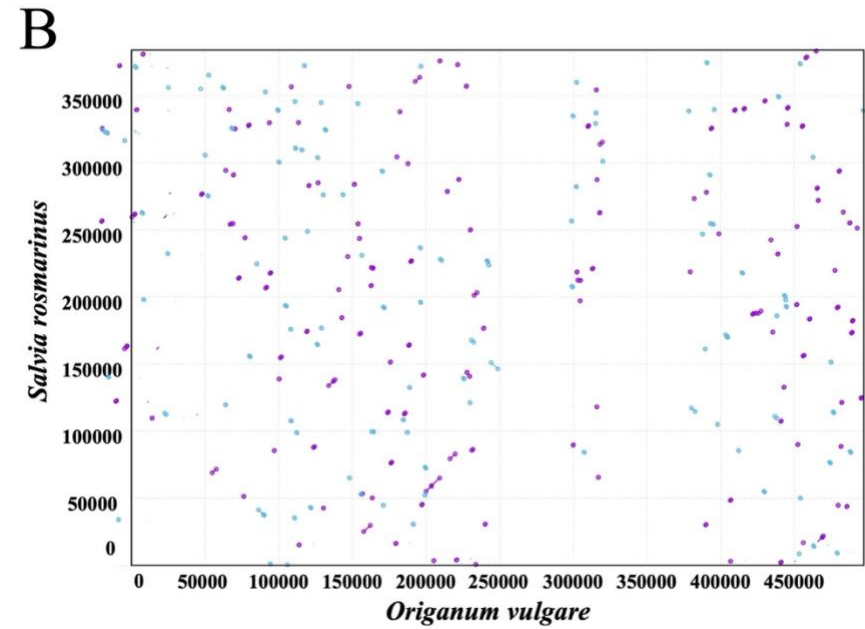

Supplement: Supplementary file 2 [file 0e85008f66ad7799c4435232.pdf]
