# Supplementary material for: Mitogenome Architecture and Evolutionary Insights in Origanum vulgare: Comparative Analysis of Structural Diversity and Repeat-Mediated Recombination
Source: Research Square preprint supplement (doi:10.21203/rs.3.rs-7070486/v1), 2025-07-24
Supplement: Supplementary file 2 [file 1ee9b27cd88b815cf63f6599.docx]

**Table S2 | Relative synonymous codon usage (RSCU) of the mitochondrial genome of *Origanum vulgare.***

| **Amino** | **Codon 1 RSCU** | **Codon 2 RSCU** | **Codon 3 RSCU** | **Codon 4 RSCU** | **Codon 5 RSCU** | **Codon 6 RSCU** |
| --- | --- | --- | --- | --- | --- | --- |
| Ala | GCG(0.61) | GCC(0.88) | GCA(1.02) | GCU(1.50) |  |  |
| Arg | CGC(0.76) | AGG(1.23) | CGG(0.76) | CGU(0.68) | CGA(1.02) | AGA(1.79) |
| Asn | AAC(0.83) | AAU(1.17) |  |  |  |  |
| Asp | GAC(0.71) | GAU(1.29) |  |  |  |  |
| Cys | UGC(0.96) | UGU(1.04) |  |  |  |  |
| Gln | CAG(0.77) | CAA(1.23) |  |  |  |  |
| Glu | GAG(0.74) | GAA(1.26) |  |  |  |  |
| Gly | GGC(0.72) | GGG(0.96) | GGU(1.00) | GGA(1.32) |  |  |
| His | CAC(0.70) | CAU(1.30) |  |  |  |  |
| Ile | AUC(0.88) | AUA(0.94) | AUU(1.18) |  |  |  |
| Leu | CUG(0.66) | CUC(0.84) | CUA(0.97) | UUG(1.03) | CUU(1.43) | UUA(1.08) |
| Lys | AAG(0.95) | AAA(1.05) |  |  |  |  |
| Met | AUG(1.00) |  |  |  |  |  |
| Phe | UUC(0.92) | UUU(1.08) |  |  |  |  |
| Pro | CCG(0.69) | CCC(0.95) | CCA(1.05) | CCU(1.31) |  |  |
| Ser | AGC(0.90) | UCG(0.74) | UCC(0.97) | AGU(1.01) | UCA(1.01) | UCU(1.37) |
| Thr | ACG(0.70) | ACC(0.97) | ACA(1.00) | ACU(1.33) |  |  |
| Trp | UGG(1.00) |  |  |  |  |  |
| Tyr | UAC(0.73) | UAU(1.27) |  |  |  |  |
| Val | GUC(0.79) | GUG(0.81) | GUA(1.12) | GUU(1.27) |  |  |
| End | UAG(1.04) | UGA(0.94) | UAA(1.02) |  |  |  |
