# Supplementary material for: Mitogenome Architecture and Evolutionary Insights in Origanum vulgare: Comparative Analysis of Structural Diversity and Repeat-Mediated Recombination
Source: Research Square preprint supplement (doi:10.21203/rs.3.rs-7070486/v1), 2025-07-24
Supplement: Supplementary file 3 [file 28f14adb2c4dc7b14b7d4cc3.docx]

**Table S5 | Dispersed repeats in the mitochondrial genome of *Origanum vulgare.***

| **The Chr that the first part located** | **The repeat length of the first part** | **The start site of the first part** | **Type** | **The Chr that the second part located** | **The repeat length of the second part** | **The start site of the second part** | **Interval distance of repeats** | **E-value** |
| --- | --- | --- | --- | --- | --- | --- | --- | --- |
| mtChr1 | 250545 | 298783 | F | mtChr1 | 329428 | 377666 | 0 | 0.00E+00 |
| mtChr1 | 170058 | 177035 | P | mtChr1 | 473795 | 480772 | 0 | 0.00E+00 |
| mtChr1 | 93685 | 99960 | P | mtChr1 | 409206 | 415481 | 0 | 0.00E+00 |
| mtChr1 | 64119 | 69745 | P | mtChr1 | 392262 | 397888 | 0 | 0.00E+00 |
| mtChr1 | 38182 | 41925 | F | mtChr1 | 58232 | 61975 | 0 | 0.00E+00 |
| mtChr1 | 384168 | 387114 | F | mtChr1 | 418211 | 421157 | 0 | 0.00E+00 |
| mtChr1 | 189259 | 191997 | P | mtChr1 | 239586 | 242324 | 0 | 0.00E+00 |
| mtChr1 | 171260 | 173824 | F | mtChr1 | 445934 | 448498 | 0 | 0.00E+00 |
| mtChr1 | 445934 | 448498 | P | mtChr1 | 477006 | 479570 | 0 | 0.00E+00 |
| mtChr1 | 286281 | 288754 | P | mtChr1 | 438030 | 440503 | 0 | 0.00E+00 |
| mtChr1 | 365164 | 367637 | P | mtChr1 | 438030 | 440503 | 0 | 0.00E+00 |
| mtChr1 | 295833 | 297386 | P | mtChr1 | 482212 | 483765 | 0 | 0.00E+00 |
| mtChr1 | 374716 | 376269 | P | mtChr1 | 482212 | 483765 | 0 | 0.00E+00 |
| mtChr1 | 114023 | 115331 | F | mtChr1 | 149674 | 150982 | 0 | 0.00E+00 |
| mtChr1 | 24861 | 25635 | P | mtChr1 | 496469 | 497243 | 0 | 0.00E+00 |
| mtChr1 | 95573 | 96225 | F | mtChr1 | 179379 | 180031 | 0 | 0.00E+00 |
| mtChr1 | 179379 | 180031 | P | mtChr1 | 412941 | 413593 | 0 | 0.00E+00 |
| mtChr1 | 309929 | 310439 | F | mtChr1 | 455303 | 455813 | 0 | 0.00E+00 |
| mtChr1 | 91552 | 91992 | F | mtChr1 | 185004 | 185444 | 0 | 8.63E-255 |
| mtChr1 | 292172 | 292518 | F | mtChr1 | 407702 | 408048 | -3 | 6.25E-190 |
| mtChr1 | 371055 | 371401 | F | mtChr1 | 407702 | 408048 | -3 | 6.25E-190 |
| mtChr1 | 306485 | 306802 | F | mtChr1 | 388533 | 388850 | -3 | 1.39E-172 |
| mtChr1 | 306505 | 306802 | F | mtChr1 | 388553 | 388850 | -1 | 9.56E-166 |
| mtChr1 | 116766 | 117032 | F | mtChr1 | 276907 | 277173 | -3 | 4.14E-142 |
| mtChr1 | 116766 | 117032 | F | mtChr1 | 355790 | 356056 | -3 | 4.14E-142 |
| mtChr1 | 116780 | 117032 | F | mtChr1 | 276921 | 277173 | -2 | 3.78E-136 |
| mtChr1 | 116780 | 117032 | F | mtChr1 | 355804 | 356056 | -2 | 3.78E-136 |
| mtChr1 | 51628 | 51855 | F | mtChr1 | 429235 | 429462 | 0 | 1.49E-126 |
| mtChr1 | 41928 | 42138 | P | mtChr1 | 454329 | 454539 | -2 | 5.07E-111 |
| mtChr1 | 41917 | 42128 | P | mtChr1 | 454339 | 454550 | -3 | 2.68E-109 |
| mtChr1 | 307268 | 307449 | F | mtChr1 | 488261 | 488442 | -3 | 1.94E-91 |
| mtChr1 | 292348 | 292518 | F | mtChr1 | 407878 | 408048 | -2 | 4.01E-87 |
| mtChr1 | 371231 | 371401 | F | mtChr1 | 407878 | 408048 | -2 | 4.01E-87 |
| mtChr1 | 307320 | 307483 | F | mtChr1 | 488313 | 488476 | -2 | 6.04E-83 |
| mtChr1 | 37325 | 37482 | P | mtChr1 | 96391 | 96548 | -1 | 9.81E-82 |
| mtChr1 | 37325 | 37482 | F | mtChr1 | 412618 | 412775 | -1 | 9.81E-82 |
| mtChr1 | 104008 | 104156 | P | mtChr1 | 116671 | 116819 | -1 | 2.43E-76 |
| mtChr1 | 41992 | 42138 | P | mtChr1 | 454329 | 454475 | -1 | 3.83E-75 |
| mtChr1 | 104017 | 104156 | P | mtChr1 | 116671 | 116810 | 0 | 1.43E-73 |
| mtChr1 | 292612 | 292750 | F | mtChr1 | 306584 | 306722 | -1 | 2.37E-70 |
| mtChr1 | 292612 | 292750 | F | mtChr1 | 388632 | 388770 | -1 | 2.37E-70 |
| mtChr1 | 306584 | 306722 | F | mtChr1 | 371495 | 371633 | -1 | 2.37E-70 |
| mtChr1 | 371495 | 371633 | F | mtChr1 | 388632 | 388770 | -1 | 2.37E-70 |
| mtChr1 | 121270 | 121385 | P | mtChr1 | 435256 | 435371 | 0 | 4.03E-59 |
| mtChr1 | 140831 | 140942 | F | mtChr1 | 493020 | 493131 | 0 | 1.03E-56 |
| mtChr1 | 169210 | 169330 | F | mtChr1 | 304188 | 304308 | -3 | 2.98E-55 |
| mtChr1 | 287613 | 287721 | F | mtChr1 | 460742 | 460850 | 0 | 6.60E-55 |
| mtChr1 | 366496 | 366604 | F | mtChr1 | 460742 | 460850 | 0 | 6.60E-55 |
| mtChr1 | 439063 | 439171 | P | mtChr1 | 460742 | 460850 | 0 | 6.60E-55 |
| mtChr1 | 169219 | 169330 | F | mtChr1 | 304197 | 304308 | -1 | 3.44E-54 |
| mtChr1 | 61938 | 62044 | P | mtChr1 | 254865 | 254971 | 0 | 1.06E-53 |
| mtChr1 | 61938 | 62044 | P | mtChr1 | 333748 | 333854 | 0 | 1.06E-53 |
| mtChr1 | 7186 | 7285 | P | mtChr1 | 32987 | 33086 | 0 | 1.73E-49 |
| mtChr1 | 132551 | 132644 | P | mtChr1 | 145941 | 146034 | 0 | 7.09E-46 |
| mtChr1 | 279391 | 279483 | F | mtChr1 | 452482 | 452574 | 0 | 2.84E-45 |
| mtChr1 | 358274 | 358366 | F | mtChr1 | 452482 | 452574 | 0 | 2.84E-45 |
| mtChr1 | 253406 | 253505 | F | mtChr1 | 408018 | 408117 | -2 | 7.56E-45 |
| mtChr1 | 332289 | 332388 | F | mtChr1 | 408018 | 408117 | -2 | 7.56E-45 |
| mtChr1 | 72140 | 72230 | P | mtChr1 | 404768 | 404858 | 0 | 4.54E-44 |
| mtChr1 | 63304 | 63391 | F | mtChr1 | 90760 | 90847 | -2 | 9.78E-38 |
| mtChr1 | 292488 | 292565 | F | mtChr1 | 306448 | 306525 | 0 | 3.05E-36 |
| mtChr1 | 306448 | 306525 | F | mtChr1 | 371371 | 371448 | 0 | 3.05E-36 |
| mtChr1 | 421408 | 421485 | F | mtChr1 | 455852 | 455929 | 0 | 3.05E-36 |
| mtChr1 | 63313 | 63391 | F | mtChr1 | 90769 | 90847 | -1 | 1.78E-34 |
| mtChr1 | 28542 | 28616 | F | mtChr1 | 309857 | 309931 | 0 | 1.95E-34 |
| mtChr1 | 57975 | 58049 | P | mtChr1 | 220165 | 220239 | 0 | 1.95E-34 |
| mtChr1 | 8807 | 8879 | F | mtChr1 | 296169 | 296241 | 0 | 3.12E-33 |
| mtChr1 | 8807 | 8879 | F | mtChr1 | 375052 | 375124 | 0 | 3.12E-33 |
| mtChr1 | 8807 | 8879 | P | mtChr1 | 483357 | 483429 | 0 | 3.12E-33 |
| mtChr1 | 41909 | 41991 | P | mtChr1 | 454476 | 454558 | -3 | 7.11E-33 |
| mtChr1 | 434065 | 434136 | P | mtChr1 | 486908 | 486979 | 0 | 1.25E-32 |
| mtChr1 | 74741 | 74810 | P | mtChr1 | 427654 | 427723 | 0 | 2.00E-31 |
| mtChr1 | 170409 | 170477 | P | mtChr1 | 462688 | 462756 | 0 | 7.98E-31 |
| mtChr1 | 306334 | 306402 | F | mtChr1 | 427378 | 427446 | 0 | 7.98E-31 |
| mtChr1 | 462688 | 462756 | F | mtChr1 | 480353 | 480421 | 0 | 7.98E-31 |
| mtChr1 | 292508 | 292585 | F | mtChr1 | 423967 | 424044 | -3 | 6.01E-30 |
| mtChr1 | 371391 | 371468 | F | mtChr1 | 423967 | 424044 | -3 | 6.01E-30 |
| mtChr1 | 30602 | 30668 | P | mtChr1 | 73240 | 73306 | 0 | 1.28E-29 |
| mtChr1 | 213796 | 213862 | F | mtChr1 | 316299 | 316365 | 0 | 1.28E-29 |
| mtChr1 | 222592 | 222657 | P | mtChr1 | 315246 | 315311 | 0 | 5.11E-29 |
| mtChr1 | 191926 | 191994 | P | mtChr1 | 462492 | 462560 | -1 | 1.63E-28 |
| mtChr1 | 239589 | 239657 | F | mtChr1 | 462492 | 462560 | -1 | 1.63E-28 |
| mtChr1 | 17213 | 17277 | P | mtChr1 | 389592 | 389656 | 0 | 2.04E-28 |
| mtChr1 | 63327 | 63391 | F | mtChr1 | 90783 | 90847 | 0 | 2.04E-28 |
| mtChr1 | 292689 | 292750 | F | mtChr1 | 306661 | 306722 | 0 | 1.31E-26 |
| mtChr1 | 292689 | 292750 | F | mtChr1 | 388709 | 388770 | 0 | 1.31E-26 |
| mtChr1 | 306661 | 306722 | F | mtChr1 | 371572 | 371633 | 0 | 1.31E-26 |
| mtChr1 | 371572 | 371633 | F | mtChr1 | 388709 | 388770 | 0 | 1.31E-26 |
| mtChr1 | 5809 | 5876 | P | mtChr1 | 321481 | 321548 | -2 | 6.35E-26 |
| mtChr1 | 170488 | 170558 | F | mtChr1 | 306166 | 306236 | -3 | 7.37E-26 |
| mtChr1 | 306166 | 306236 | P | mtChr1 | 480272 | 480342 | -3 | 7.37E-26 |
| mtChr1 | 239598 | 239657 | F | mtChr1 | 462501 | 462560 | 0 | 2.09E-25 |
| mtChr1 | 173603 | 173665 | P | mtChr1 | 406493 | 406555 | -1 | 6.08E-25 |
| mtChr1 | 406493 | 406555 | P | mtChr1 | 448277 | 448339 | -1 | 6.08E-25 |
| mtChr1 | 406493 | 406555 | F | mtChr1 | 477165 | 477227 | -1 | 6.08E-25 |
| mtChr1 | 230841 | 230909 | F | mtChr1 | 464279 | 464347 | -3 | 1.08E-24 |
| mtChr1 | 79076 | 79133 | F | mtChr1 | 421480 | 421537 | 0 | 3.35E-24 |
| mtChr1 | 163864 | 163919 | F | mtChr1 | 313263 | 313318 | 0 | 5.36E-23 |
| mtChr1 | 41186 | 41251 | P | mtChr1 | 397981 | 398046 | -3 | 6.03E-23 |
| mtChr1 | 61236 | 61301 | P | mtChr1 | 397981 | 398046 | -3 | 6.03E-23 |
| mtChr1 | 170509 | 170574 | F | mtChr1 | 306187 | 306252 | -3 | 6.03E-23 |
| mtChr1 | 306187 | 306252 | P | mtChr1 | 480256 | 480321 | -3 | 6.03E-23 |
| mtChr1 | 407260 | 407318 | F | mtChr1 | 421235 | 421293 | -1 | 1.46E-22 |
| mtChr1 | 142718 | 142772 | P | mtChr1 | 155763 | 155817 | 0 | 2.14E-22 |
| mtChr1 | 57681 | 57742 | P | mtChr1 | 471088 | 471149 | -2 | 2.15E-22 |
| mtChr1 | 230839 | 230903 | P | mtChr1 | 423776 | 423840 | -3 | 2.30E-22 |
| mtChr1 | 298770 | 298827 | P | mtChr1 | 317809 | 317866 | -1 | 5.73E-22 |
| mtChr1 | 255615 | 255678 | F | mtChr1 | 488482 | 488545 | -3 | 8.76E-22 |
| mtChr1 | 334498 | 334561 | F | mtChr1 | 488482 | 488545 | -3 | 8.76E-22 |
| mtChr1 | 191883 | 191942 | F | mtChr1 | 462447 | 462506 | -2 | 3.22E-21 |
| mtChr1 | 239641 | 239700 | P | mtChr1 | 462447 | 462506 | -2 | 3.22E-21 |
| mtChr1 | 254640 | 254692 | F | mtChr1 | 427454 | 427506 | 0 | 3.43E-21 |
| mtChr1 | 333523 | 333575 | F | mtChr1 | 427454 | 427506 | 0 | 3.43E-21 |
| mtChr1 | 144689 | 144744 | F | mtChr1 | 172708 | 172763 | -1 | 8.84E-21 |
| mtChr1 | 144689 | 144744 | F | mtChr1 | 447382 | 447437 | -1 | 8.84E-21 |
| mtChr1 | 144689 | 144744 | P | mtChr1 | 478067 | 478122 | -1 | 8.84E-21 |
| mtChr1 | 17335 | 17396 | P | mtChr1 | 489201 | 489262 | -3 | 1.27E-20 |
| mtChr1 | 306468 | 306525 | F | mtChr1 | 423967 | 424024 | -2 | 4.81E-20 |
| mtChr1 | 127342 | 127392 | P | mtChr1 | 496254 | 496304 | 0 | 5.49E-20 |
| mtChr1 | 254668 | 254727 | F | mtChr1 | 421431 | 421490 | -3 | 1.84E-19 |
| mtChr1 | 333551 | 333610 | F | mtChr1 | 421431 | 421490 | -3 | 1.84E-19 |
| mtChr1 | 88395 | 88444 | F | mtChr1 | 194488 | 194537 | 0 | 2.19E-19 |
| mtChr1 | 311016 | 311071 | F | mtChr1 | 424439 | 424494 | -2 | 7.16E-19 |
| mtChr1 | 298779 | 298827 | P | mtChr1 | 317809 | 317857 | 0 | 8.78E-19 |
| mtChr1 | 382049 | 382106 | P | mtChr1 | 480936 | 480993 | -3 | 2.65E-18 |
| mtChr1 | 172653 | 172707 | P | mtChr1 | 321508 | 321562 | -2 | 2.76E-18 |
| mtChr1 | 321508 | 321562 | P | mtChr1 | 447327 | 447381 | -2 | 2.76E-18 |
| mtChr1 | 321508 | 321562 | F | mtChr1 | 478123 | 478177 | -2 | 2.76E-18 |
| mtChr1 | 231273 | 231329 | F | mtChr1 | 434226 | 434282 | -3 | 1.00E-17 |
| mtChr1 | 79026 | 79072 | F | mtChr1 | 421424 | 421470 | 0 | 1.40E-17 |
| mtChr1 | 79026 | 79072 | F | mtChr1 | 455868 | 455914 | 0 | 1.40E-17 |
| mtChr1 | 170522 | 170574 | F | mtChr1 | 306200 | 306252 | -2 | 4.09E-17 |
| mtChr1 | 306200 | 306252 | P | mtChr1 | 480256 | 480308 | -2 | 4.09E-17 |
| mtChr1 | 34903 | 34951 | F | mtChr1 | 49288 | 49336 | -1 | 1.26E-16 |
| mtChr1 | 253457 | 253505 | F | mtChr1 | 408069 | 408117 | -1 | 1.26E-16 |
| mtChr1 | 255630 | 255678 | F | mtChr1 | 488497 | 488545 | -1 | 1.26E-16 |
| mtChr1 | 332340 | 332388 | F | mtChr1 | 408069 | 408117 | -1 | 1.26E-16 |
| mtChr1 | 334513 | 334561 | F | mtChr1 | 488497 | 488545 | -1 | 1.26E-16 |
| mtChr1 | 254668 | 254722 | F | mtChr1 | 455875 | 455929 | -3 | 1.44E-16 |
| mtChr1 | 333551 | 333605 | F | mtChr1 | 455875 | 455929 | -3 | 1.44E-16 |
| mtChr1 | 41994 | 42045 | P | mtChr1 | 423023 | 423074 | -2 | 1.57E-16 |
| mtChr1 | 423023 | 423074 | F | mtChr1 | 454422 | 454473 | -2 | 1.57E-16 |
| mtChr1 | 173122 | 173166 | P | mtChr1 | 180719 | 180763 | 0 | 2.25E-16 |
| mtChr1 | 180719 | 180763 | P | mtChr1 | 447796 | 447840 | 0 | 2.25E-16 |
| mtChr1 | 180719 | 180763 | F | mtChr1 | 477664 | 477708 | 0 | 2.25E-16 |
| mtChr1 | 230741 | 230785 | F | mtChr1 | 463308 | 463352 | 0 | 2.25E-16 |
| mtChr1 | 5791 | 5844 | F | mtChr1 | 139255 | 139308 | -3 | 5.42E-16 |
| mtChr1 | 104008 | 104061 | P | mtChr1 | 276907 | 276960 | -3 | 5.42E-16 |
| mtChr1 | 104008 | 104061 | P | mtChr1 | 355790 | 355843 | -3 | 5.42E-16 |
| mtChr1 | 276442 | 276495 | P | mtChr1 | 292533 | 292586 | -3 | 5.42E-16 |
| mtChr1 | 276442 | 276495 | P | mtChr1 | 371416 | 371469 | -3 | 5.42E-16 |
| mtChr1 | 292487 | 292540 | F | mtChr1 | 388495 | 388548 | -3 | 5.42E-16 |
| mtChr1 | 292533 | 292586 | P | mtChr1 | 355325 | 355378 | -3 | 5.42E-16 |
| mtChr1 | 355325 | 355378 | P | mtChr1 | 371416 | 371469 | -3 | 5.42E-16 |
| mtChr1 | 371370 | 371423 | F | mtChr1 | 388495 | 388548 | -3 | 5.42E-16 |
| mtChr1 | 230820 | 230870 | F | mtChr1 | 464258 | 464308 | -2 | 6.05E-16 |
| mtChr1 | 255076 | 255126 | F | mtChr1 | 309906 | 309956 | -2 | 6.05E-16 |
| mtChr1 | 309906 | 309956 | F | mtChr1 | 333959 | 334009 | -2 | 6.05E-16 |
| mtChr1 | 227501 | 227544 | P | mtChr1 | 468754 | 468797 | 0 | 8.99E-16 |
| mtChr1 | 41888 | 41940 | P | mtChr1 | 254919 | 254971 | -3 | 2.05E-15 |
| mtChr1 | 41888 | 41940 | P | mtChr1 | 333802 | 333854 | -3 | 2.05E-15 |
| mtChr1 | 306448 | 306500 | F | mtChr1 | 388496 | 388548 | -3 | 2.05E-15 |
| mtChr1 | 254685 | 254727 | F | mtChr1 | 421448 | 421490 | 0 | 3.60E-15 |
| mtChr1 | 275822 | 275864 | P | mtChr1 | 455133 | 455175 | 0 | 3.60E-15 |
| mtChr1 | 333568 | 333610 | F | mtChr1 | 421448 | 421490 | 0 | 3.60E-15 |
| mtChr1 | 354705 | 354747 | P | mtChr1 | 455133 | 455175 | 0 | 3.60E-15 |
| mtChr1 | 406513 | 406555 | P | mtChr1 | 448277 | 448319 | 0 | 3.60E-15 |
| mtChr1 | 406513 | 406555 | F | mtChr1 | 477185 | 477227 | 0 | 3.60E-15 |
| mtChr1 | 409181 | 409223 | F | mtChr1 | 425588 | 425630 | 0 | 3.60E-15 |
| mtChr1 | 31287 | 31332 | F | mtChr1 | 492889 | 492934 | -1 | 7.58E-15 |
| mtChr1 | 5808 | 5849 | F | mtChr1 | 172666 | 172707 | 0 | 1.44E-14 |
| mtChr1 | 5808 | 5849 | F | mtChr1 | 447340 | 447381 | 0 | 1.44E-14 |
| mtChr1 | 5808 | 5849 | P | mtChr1 | 478123 | 478164 | 0 | 1.44E-14 |
| mtChr1 | 5828 | 5878 | F | mtChr1 | 458668 | 458718 | -3 | 2.90E-14 |
| mtChr1 | 35583 | 35627 | P | mtChr1 | 280798 | 280842 | -1 | 2.97E-14 |
| mtChr1 | 35583 | 35627 | P | mtChr1 | 359681 | 359725 | -1 | 2.97E-14 |
| mtChr1 | 292541 | 292585 | F | mtChr1 | 424000 | 424044 | -1 | 2.97E-14 |
| mtChr1 | 371424 | 371468 | F | mtChr1 | 424000 | 424044 | -1 | 2.97E-14 |
| mtChr1 | 163822 | 163869 | F | mtChr1 | 313219 | 313266 | -2 | 3.42E-14 |
| mtChr1 | 96249 | 96289 | P | mtChr1 | 407285 | 407325 | 0 | 5.75E-14 |
| mtChr1 | 407285 | 407325 | F | mtChr1 | 412877 | 412917 | 0 | 5.75E-14 |
| mtChr1 | 8998 | 9047 | F | mtChr1 | 255288 | 255337 | -3 | 1.09E-13 |
| mtChr1 | 8998 | 9047 | F | mtChr1 | 334171 | 334220 | -3 | 1.09E-13 |
| mtChr1 | 51597 | 51640 | P | mtChr1 | 401317 | 401360 | -1 | 1.16E-13 |
| mtChr1 | 9100 | 9146 | F | mtChr1 | 255390 | 255436 | -2 | 1.31E-13 |
| mtChr1 | 9100 | 9146 | F | mtChr1 | 334273 | 334319 | -2 | 1.31E-13 |
| mtChr1 | 5805 | 5844 | F | mtChr1 | 139269 | 139308 | 0 | 2.30E-13 |
| mtChr1 | 15051 | 15090 | F | mtChr1 | 179039 | 179078 | 0 | 2.30E-13 |
| mtChr1 | 96209 | 96248 | P | mtChr1 | 191992 | 192031 | 0 | 2.30E-13 |
| mtChr1 | 191992 | 192031 | F | mtChr1 | 412918 | 412957 | 0 | 2.30E-13 |
| mtChr1 | 104017 | 104065 | P | mtChr1 | 276903 | 276951 | -3 | 4.10E-13 |
| mtChr1 | 104017 | 104065 | P | mtChr1 | 355786 | 355834 | -3 | 4.10E-13 |
| mtChr1 | 423032 | 423074 | F | mtChr1 | 454431 | 454473 | -1 | 4.53E-13 |
| mtChr1 | 421358 | 421396 | F | mtChr1 | 455823 | 455861 | 0 | 9.20E-13 |
| mtChr1 | 30212 | 30259 | F | mtChr1 | 485092 | 485139 | -3 | 1.54E-12 |
| mtChr1 | 94674 | 94711 | F | mtChr1 | 269331 | 269368 | 0 | 3.68E-12 |
| mtChr1 | 94674 | 94711 | F | mtChr1 | 348214 | 348251 | 0 | 3.68E-12 |
| mtChr1 | 185618 | 185655 | F | mtChr1 | 409157 | 409194 | 0 | 3.68E-12 |
| mtChr1 | 230872 | 230909 | F | mtChr1 | 464310 | 464347 | 0 | 3.68E-12 |
| mtChr1 | 254685 | 254722 | F | mtChr1 | 455892 | 455929 | 0 | 3.68E-12 |
| mtChr1 | 255089 | 255126 | F | mtChr1 | 309919 | 309956 | 0 | 3.68E-12 |
| mtChr1 | 269331 | 269368 | P | mtChr1 | 414455 | 414492 | 0 | 3.68E-12 |
| mtChr1 | 309919 | 309956 | F | mtChr1 | 333972 | 334009 | 0 | 3.68E-12 |
| mtChr1 | 333568 | 333605 | F | mtChr1 | 455892 | 455929 | 0 | 3.68E-12 |
| mtChr1 | 348214 | 348251 | P | mtChr1 | 414455 | 414492 | 0 | 3.68E-12 |
| mtChr1 | 4197 | 4243 | F | mtChr1 | 495932 | 495978 | -3 | 5.76E-12 |
| mtChr1 | 132516 | 132556 | F | mtChr1 | 242633 | 242673 | -1 | 6.90E-12 |
| mtChr1 | 66210 | 66253 | F | mtChr1 | 252960 | 253003 | -2 | 7.30E-12 |
| mtChr1 | 66210 | 66253 | F | mtChr1 | 331843 | 331886 | -2 | 7.30E-12 |
| mtChr1 | 89780 | 89823 | P | mtChr1 | 318275 | 318318 | -2 | 7.30E-12 |
| mtChr1 | 158893 | 158936 | P | mtChr1 | 313710 | 313753 | -2 | 7.30E-12 |
| mtChr1 | 232543 | 232586 | P | mtChr1 | 290048 | 290091 | -2 | 7.30E-12 |
| mtChr1 | 232543 | 232586 | P | mtChr1 | 368931 | 368974 | -2 | 7.30E-12 |
| mtChr1 | 252960 | 253003 | P | mtChr1 | 395754 | 395797 | -2 | 7.30E-12 |
| mtChr1 | 331843 | 331886 | P | mtChr1 | 395754 | 395797 | -2 | 7.30E-12 |
| mtChr1 | 4989 | 5025 | F | mtChr1 | 138163 | 138199 | 0 | 1.47E-11 |
| mtChr1 | 139272 | 139308 | F | mtChr1 | 172666 | 172702 | 0 | 1.47E-11 |
| mtChr1 | 139272 | 139308 | F | mtChr1 | 447340 | 447376 | 0 | 1.47E-11 |
| mtChr1 | 139272 | 139308 | P | mtChr1 | 478128 | 478164 | 0 | 1.47E-11 |
| mtChr1 | 276354 | 276399 | P | mtChr1 | 306253 | 306298 | -3 | 2.15E-11 |
| mtChr1 | 306253 | 306298 | P | mtChr1 | 355237 | 355282 | -3 | 2.15E-11 |
| mtChr1 | 288688 | 288727 | F | mtChr1 | 421278 | 421317 | -1 | 2.69E-11 |
| mtChr1 | 367571 | 367610 | F | mtChr1 | 421278 | 421317 | -1 | 2.69E-11 |
| mtChr1 | 421278 | 421317 | P | mtChr1 | 438057 | 438096 | -1 | 2.69E-11 |
| mtChr1 | 257153 | 257195 | F | mtChr1 | 386671 | 386713 | -2 | 2.79E-11 |
| mtChr1 | 257153 | 257195 | F | mtChr1 | 420714 | 420756 | -2 | 2.79E-11 |
| mtChr1 | 336036 | 336078 | F | mtChr1 | 386671 | 386713 | -2 | 2.79E-11 |
| mtChr1 | 336036 | 336078 | F | mtChr1 | 420714 | 420756 | -2 | 2.79E-11 |
| mtChr1 | 139273 | 139308 | P | mtChr1 | 321513 | 321548 | 0 | 5.89E-11 |
| mtChr1 | 8738 | 8782 | P | mtChr1 | 306170 | 306214 | -3 | 8.03E-11 |
| mtChr1 | 276443 | 276487 | P | mtChr1 | 424000 | 424044 | -3 | 8.03E-11 |
| mtChr1 | 276511 | 276555 | P | mtChr1 | 306433 | 306477 | -3 | 8.03E-11 |
| mtChr1 | 306433 | 306477 | P | mtChr1 | 355394 | 355438 | -3 | 8.03E-11 |
| mtChr1 | 355326 | 355370 | P | mtChr1 | 424000 | 424044 | -3 | 8.03E-11 |
| mtChr1 | 275714 | 275752 | F | mtChr1 | 481223 | 481261 | -1 | 1.05E-10 |
| mtChr1 | 354597 | 354635 | F | mtChr1 | 481223 | 481261 | -1 | 1.05E-10 |
| mtChr1 | 435145 | 435186 | P | mtChr1 | 462198 | 462239 | -2 | 1.06E-10 |
| mtChr1 | 239084 | 239118 | F | mtChr1 | 430815 | 430849 | 0 | 2.36E-10 |
| mtChr1 | 487272 | 487306 | P | mtChr1 | 495099 | 495133 | 0 | 2.36E-10 |
| mtChr1 | 255046 | 255089 | F | mtChr1 | 306377 | 306420 | -3 | 2.99E-10 |
| mtChr1 | 306377 | 306420 | F | mtChr1 | 333929 | 333972 | -3 | 2.99E-10 |
| mtChr1 | 154281 | 154321 | P | mtChr1 | 190635 | 190675 | -2 | 4.04E-10 |
| mtChr1 | 154281 | 154321 | F | mtChr1 | 240908 | 240948 | -2 | 4.04E-10 |
| mtChr1 | 276455 | 276495 | P | mtChr1 | 292533 | 292573 | -2 | 4.04E-10 |
| mtChr1 | 276455 | 276495 | P | mtChr1 | 371416 | 371456 | -2 | 4.04E-10 |
| mtChr1 | 292525 | 292565 | F | mtChr1 | 388533 | 388573 | -2 | 4.04E-10 |
| mtChr1 | 355338 | 355378 | P | mtChr1 | 371416 | 371456 | -2 | 4.04E-10 |
| mtChr1 | 371408 | 371448 | F | mtChr1 | 388533 | 388573 | -2 | 4.04E-10 |
| mtChr1 | 388533 | 388573 | F | mtChr1 | 423984 | 424024 | -2 | 4.04E-10 |
| mtChr1 | 38630 | 38663 | F | mtChr1 | 189626 | 189659 | 0 | 9.42E-10 |
| mtChr1 | 38630 | 38663 | P | mtChr1 | 241924 | 241957 | 0 | 9.42E-10 |
| mtChr1 | 58680 | 58713 | F | mtChr1 | 189626 | 189659 | 0 | 9.42E-10 |
| mtChr1 | 58680 | 58713 | P | mtChr1 | 241924 | 241957 | 0 | 9.42E-10 |
| mtChr1 | 113891 | 113924 | F | mtChr1 | 148167 | 148200 | 0 | 9.42E-10 |
| mtChr1 | 255046 | 255079 | F | mtChr1 | 427421 | 427454 | 0 | 9.42E-10 |
| mtChr1 | 307450 | 307483 | F | mtChr1 | 488443 | 488476 | 0 | 9.42E-10 |
| mtChr1 | 310806 | 310839 | F | mtChr1 | 424233 | 424266 | 0 | 9.42E-10 |
| mtChr1 | 333929 | 333962 | F | mtChr1 | 427421 | 427454 | 0 | 9.42E-10 |
| mtChr1 | 117066 | 117105 | F | mtChr1 | 277215 | 277254 | -2 | 1.53E-09 |
| mtChr1 | 117066 | 117105 | F | mtChr1 | 356098 | 356137 | -2 | 1.53E-09 |
| mtChr1 | 461529 | 461565 | F | mtChr1 | 464895 | 464931 | -1 | 1.59E-09 |
| mtChr1 | 9198 | 9230 | F | mtChr1 | 154551 | 154583 | 0 | 3.77E-09 |
| mtChr1 | 108565 | 108597 | F | mtChr1 | 401079 | 401111 | 0 | 3.77E-09 |
| mtChr1 | 166010 | 166042 | P | mtChr1 | 166010 | 166042 | 0 | 3.77E-09 |
| mtChr1 | 280440 | 280472 | F | mtChr1 | 416708 | 416740 | 0 | 3.77E-09 |
| mtChr1 | 359323 | 359355 | F | mtChr1 | 416708 | 416740 | 0 | 3.77E-09 |
| mtChr1 | 454268 | 454300 | P | mtChr1 | 463836 | 463868 | 0 | 3.77E-09 |
| mtChr1 | 41628 | 41669 | P | mtChr1 | 279500 | 279541 | -3 | 4.14E-09 |
| mtChr1 | 41628 | 41669 | P | mtChr1 | 358383 | 358424 | -3 | 4.14E-09 |
| mtChr1 | 61678 | 61719 | P | mtChr1 | 279500 | 279541 | -3 | 4.14E-09 |
| mtChr1 | 61678 | 61719 | P | mtChr1 | 358383 | 358424 | -3 | 4.14E-09 |
| mtChr1 | 423793 | 423834 | P | mtChr1 | 464283 | 464324 | -3 | 4.14E-09 |
| mtChr1 | 41213 | 41251 | P | mtChr1 | 397981 | 398019 | -2 | 5.82E-09 |
| mtChr1 | 61263 | 61301 | P | mtChr1 | 397981 | 398019 | -2 | 5.82E-09 |
| mtChr1 | 48973 | 49008 | P | mtChr1 | 288608 | 288643 | -1 | 6.18E-09 |
| mtChr1 | 48973 | 49008 | P | mtChr1 | 367491 | 367526 | -1 | 6.18E-09 |
| mtChr1 | 48973 | 49008 | F | mtChr1 | 438141 | 438176 | -1 | 6.18E-09 |
| mtChr1 | 111490 | 111525 | P | mtChr1 | 485246 | 485281 | -1 | 6.18E-09 |
| mtChr1 | 201864 | 201899 | F | mtChr1 | 436964 | 436999 | -1 | 6.18E-09 |
| mtChr1 | 229652 | 229687 | P | mtChr1 | 276030 | 276065 | -1 | 6.18E-09 |
| mtChr1 | 229652 | 229687 | P | mtChr1 | 354913 | 354948 | -1 | 6.18E-09 |
| mtChr1 | 4524 | 4555 | F | mtChr1 | 157101 | 157132 | 0 | 1.51E-08 |
| mtChr1 | 42083 | 42114 | F | mtChr1 | 286721 | 286752 | 0 | 1.51E-08 |
| mtChr1 | 42083 | 42114 | F | mtChr1 | 365604 | 365635 | 0 | 1.51E-08 |
| mtChr1 | 42083 | 42114 | P | mtChr1 | 440032 | 440063 | 0 | 1.51E-08 |
| mtChr1 | 81019 | 81050 | P | mtChr1 | 301699 | 301730 | 0 | 1.51E-08 |
| mtChr1 | 96379 | 96410 | P | mtChr1 | 127428 | 127459 | 0 | 1.51E-08 |
| mtChr1 | 127428 | 127459 | F | mtChr1 | 412756 | 412787 | 0 | 1.51E-08 |
| mtChr1 | 156582 | 156613 | P | mtChr1 | 311464 | 311495 | 0 | 1.51E-08 |
| mtChr1 | 286721 | 286752 | P | mtChr1 | 454353 | 454384 | 0 | 1.51E-08 |
| mtChr1 | 365604 | 365635 | P | mtChr1 | 454353 | 454384 | 0 | 1.51E-08 |
| mtChr1 | 440032 | 440063 | F | mtChr1 | 454353 | 454384 | 0 | 1.51E-08 |
| mtChr1 | 14993 | 15033 | F | mtChr1 | 179052 | 179092 | -3 | 1.53E-08 |
| mtChr1 | 30203 | 30243 | F | mtChr1 | 170026 | 170066 | -3 | 1.53E-08 |
| mtChr1 | 206070 | 206110 | F | mtChr1 | 318565 | 318605 | -3 | 1.53E-08 |
| mtChr1 | 141042 | 141079 | F | mtChr1 | 454455 | 454492 | -2 | 2.21E-08 |
| mtChr1 | 170018 | 170055 | F | mtChr1 | 485075 | 485112 | -2 | 2.21E-08 |
| mtChr1 | 253163 | 253200 | P | mtChr1 | 377983 | 378020 | -2 | 2.21E-08 |
| mtChr1 | 332046 | 332083 | P | mtChr1 | 377983 | 378020 | -2 | 2.21E-08 |
| mtChr1 | 7796 | 7830 | P | mtChr1 | 488094 | 488128 | -1 | 2.40E-08 |
| mtChr1 | 220918 | 220952 | F | mtChr1 | 279384 | 279418 | -1 | 2.40E-08 |
| mtChr1 | 220918 | 220952 | F | mtChr1 | 358267 | 358301 | -1 | 2.40E-08 |
| mtChr1 | 79033 | 79072 | F | mtChr1 | 254668 | 254707 | -3 | 5.68E-08 |
| mtChr1 | 79033 | 79072 | F | mtChr1 | 333551 | 333590 | -3 | 5.68E-08 |
| mtChr1 | 4169 | 4199 | F | mtChr1 | 495903 | 495933 | 0 | 6.03E-08 |
| mtChr1 | 27285 | 27315 | F | mtChr1 | 299417 | 299447 | 0 | 6.03E-08 |
| mtChr1 | 57749 | 57779 | P | mtChr1 | 471058 | 471088 | 0 | 6.03E-08 |
| mtChr1 | 68901 | 68931 | F | mtChr1 | 93508 | 93538 | 0 | 6.03E-08 |
| mtChr1 | 78437 | 78467 | F | mtChr1 | 107302 | 107332 | 0 | 6.03E-08 |
| mtChr1 | 93508 | 93538 | P | mtChr1 | 393076 | 393106 | 0 | 6.03E-08 |
| mtChr1 | 96347 | 96377 | F | mtChr1 | 97158 | 97188 | 0 | 6.03E-08 |
| mtChr1 | 96347 | 96377 | P | mtChr1 | 411978 | 412008 | 0 | 6.03E-08 |
| mtChr1 | 97158 | 97188 | P | mtChr1 | 412789 | 412819 | 0 | 6.03E-08 |
| mtChr1 | 276465 | 276495 | P | mtChr1 | 292533 | 292563 | 0 | 6.03E-08 |
| mtChr1 | 276465 | 276495 | P | mtChr1 | 306493 | 306523 | 0 | 6.03E-08 |
| mtChr1 | 276465 | 276495 | P | mtChr1 | 371416 | 371446 | 0 | 6.03E-08 |
| mtChr1 | 306493 | 306523 | P | mtChr1 | 355348 | 355378 | 0 | 6.03E-08 |
| mtChr1 | 355348 | 355378 | P | mtChr1 | 371416 | 371446 | 0 | 6.03E-08 |
| mtChr1 | 411978 | 412008 | F | mtChr1 | 412789 | 412819 | 0 | 6.03E-08 |
| mtChr1 | 423044 | 423074 | F | mtChr1 | 454443 | 454473 | 0 | 6.03E-08 |
| mtChr1 | 111521 | 111557 | P | mtChr1 | 485210 | 485246 | -2 | 8.35E-08 |
| mtChr1 | 253096 | 253132 | F | mtChr1 | 387976 | 388012 | -2 | 8.35E-08 |
| mtChr1 | 253400 | 253436 | F | mtChr1 | 306442 | 306478 | -2 | 8.35E-08 |
| mtChr1 | 306417 | 306453 | F | mtChr1 | 424949 | 424985 | -2 | 8.35E-08 |
| mtChr1 | 306442 | 306478 | F | mtChr1 | 332283 | 332319 | -2 | 8.35E-08 |
| mtChr1 | 331979 | 332015 | F | mtChr1 | 387976 | 388012 | -2 | 8.35E-08 |
| mtChr1 | 17545 | 17578 | P | mtChr1 | 489053 | 489086 | -1 | 9.33E-08 |
| mtChr1 | 76612 | 76645 | P | mtChr1 | 143703 | 143736 | -1 | 9.33E-08 |
| mtChr1 | 96256 | 96289 | P | mtChr1 | 421260 | 421293 | -1 | 9.33E-08 |
| mtChr1 | 147720 | 147753 | F | mtChr1 | 401099 | 401132 | -1 | 9.33E-08 |
| mtChr1 | 156872 | 156905 | P | mtChr1 | 462630 | 462663 | -1 | 9.33E-08 |
| mtChr1 | 204220 | 204253 | F | mtChr1 | 423548 | 423581 | -1 | 9.33E-08 |
| mtChr1 | 412877 | 412910 | F | mtChr1 | 421260 | 421293 | -1 | 9.33E-08 |
| mtChr1 | 8691 | 8729 | F | mtChr1 | 11609 | 11647 | -3 | 2.10E-07 |
| mtChr1 | 10637 | 10675 | P | mtChr1 | 149164 | 149202 | -3 | 2.10E-07 |
| mtChr1 | 94494 | 94532 | P | mtChr1 | 154367 | 154405 | -3 | 2.10E-07 |
| mtChr1 | 154367 | 154405 | F | mtChr1 | 414634 | 414672 | -3 | 2.10E-07 |
| mtChr1 | 221882 | 221920 | P | mtChr1 | 441178 | 441216 | -3 | 2.10E-07 |
| mtChr1 | 79140 | 79175 | F | mtChr1 | 421544 | 421579 | -2 | 3.15E-07 |
| mtChr1 | 253400 | 253435 | P | mtChr1 | 276511 | 276546 | -2 | 3.15E-07 |
| mtChr1 | 253400 | 253435 | P | mtChr1 | 355394 | 355429 | -2 | 3.15E-07 |
| mtChr1 | 276364 | 276399 | P | mtChr1 | 306253 | 306288 | -2 | 3.15E-07 |
| mtChr1 | 276511 | 276546 | P | mtChr1 | 332283 | 332318 | -2 | 3.15E-07 |
| mtChr1 | 332283 | 332318 | P | mtChr1 | 355394 | 355429 | -2 | 3.15E-07 |
| mtChr1 | 38602 | 38634 | F | mtChr1 | 96044 | 96076 | -1 | 3.62E-07 |
| mtChr1 | 38602 | 38634 | F | mtChr1 | 179850 | 179882 | -1 | 3.62E-07 |
| mtChr1 | 38602 | 38634 | P | mtChr1 | 413090 | 413122 | -1 | 3.62E-07 |
| mtChr1 | 58652 | 58684 | F | mtChr1 | 96044 | 96076 | -1 | 3.62E-07 |
| mtChr1 | 58652 | 58684 | F | mtChr1 | 179850 | 179882 | -1 | 3.62E-07 |
| mtChr1 | 58652 | 58684 | P | mtChr1 | 413090 | 413122 | -1 | 3.62E-07 |
| mtChr1 | 113830 | 113862 | F | mtChr1 | 284754 | 284786 | -1 | 3.62E-07 |
| mtChr1 | 113830 | 113862 | F | mtChr1 | 363637 | 363669 | -1 | 3.62E-07 |
| mtChr1 | 276549 | 276581 | P | mtChr1 | 389289 | 389321 | -1 | 3.62E-07 |
| mtChr1 | 355432 | 355464 | P | mtChr1 | 389289 | 389321 | -1 | 3.62E-07 |
| mtChr1 | 8738 | 8775 | P | mtChr1 | 170499 | 170536 | -3 | 7.72E-07 |
| mtChr1 | 8738 | 8775 | F | mtChr1 | 276450 | 276487 | -3 | 7.72E-07 |
| mtChr1 | 8738 | 8775 | F | mtChr1 | 355333 | 355370 | -3 | 7.72E-07 |
| mtChr1 | 8738 | 8775 | F | mtChr1 | 480294 | 480331 | -3 | 7.72E-07 |
| mtChr1 | 17050 | 17087 | P | mtChr1 | 399421 | 399458 | -3 | 7.72E-07 |
| mtChr1 | 41975 | 42012 | P | mtChr1 | 141042 | 141079 | -3 | 7.72E-07 |
| mtChr1 | 117079 | 117116 | F | mtChr1 | 277228 | 277265 | -3 | 7.72E-07 |
| mtChr1 | 117079 | 117116 | F | mtChr1 | 356111 | 356148 | -3 | 7.72E-07 |
| mtChr1 | 170029 | 170066 | F | mtChr1 | 485086 | 485123 | -3 | 7.72E-07 |
| mtChr1 | 423987 | 424024 | F | mtChr1 | 480839 | 480876 | -3 | 7.72E-07 |
| mtChr1 | 321495 | 321529 | P | mtChr1 | 458668 | 458702 | -2 | 1.19E-06 |
| mtChr1 | 275 | 306 | F | mtChr1 | 117461 | 117492 | -1 | 1.40E-06 |
| mtChr1 | 5845 | 5876 | F | mtChr1 | 279331 | 279362 | -1 | 1.40E-06 |
| mtChr1 | 5845 | 5876 | F | mtChr1 | 358214 | 358245 | -1 | 1.40E-06 |
| mtChr1 | 30212 | 30243 | F | mtChr1 | 170035 | 170066 | -1 | 1.40E-06 |
| mtChr1 | 39531 | 39562 | P | mtChr1 | 216034 | 216065 | -1 | 1.40E-06 |
| mtChr1 | 59581 | 59612 | P | mtChr1 | 216034 | 216065 | -1 | 1.40E-06 |
| mtChr1 | 81047 | 81078 | F | mtChr1 | 279422 | 279453 | -1 | 1.40E-06 |
| mtChr1 | 81047 | 81078 | F | mtChr1 | 358305 | 358336 | -1 | 1.40E-06 |
| mtChr1 | 81047 | 81078 | F | mtChr1 | 452513 | 452544 | -1 | 1.40E-06 |
| mtChr1 | 91982 | 92013 | P | mtChr1 | 182657 | 182688 | -1 | 1.40E-06 |
| mtChr1 | 93447 | 93478 | F | mtChr1 | 380199 | 380230 | -1 | 1.40E-06 |
| mtChr1 | 279331 | 279362 | P | mtChr1 | 321481 | 321512 | -1 | 1.40E-06 |
| mtChr1 | 309663 | 309694 | F | mtChr1 | 329299 | 329330 | -1 | 1.40E-06 |
| mtChr1 | 321481 | 321512 | P | mtChr1 | 358214 | 358245 | -1 | 1.40E-06 |
| mtChr1 | 9016 | 9052 | F | mtChr1 | 255306 | 255342 | -3 | 2.84E-06 |
| mtChr1 | 9016 | 9052 | F | mtChr1 | 334189 | 334225 | -3 | 2.84E-06 |
| mtChr1 | 61954 | 61990 | P | mtChr1 | 454527 | 454563 | -3 | 2.84E-06 |
| mtChr1 | 206068 | 206104 | P | mtChr1 | 490897 | 490933 | -3 | 2.84E-06 |
| mtChr1 | 217026 | 217062 | P | mtChr1 | 264495 | 264531 | -3 | 2.84E-06 |
| mtChr1 | 217026 | 217062 | P | mtChr1 | 343378 | 343414 | -3 | 2.84E-06 |
| mtChr1 | 254919 | 254955 | F | mtChr1 | 454527 | 454563 | -3 | 2.84E-06 |
| mtChr1 | 288840 | 288876 | F | mtChr1 | 422433 | 422469 | -3 | 2.84E-06 |
| mtChr1 | 333802 | 333838 | F | mtChr1 | 454527 | 454563 | -3 | 2.84E-06 |
| mtChr1 | 367723 | 367759 | F | mtChr1 | 422433 | 422469 | -3 | 2.84E-06 |
| mtChr1 | 423802 | 423838 | P | mtChr1 | 464279 | 464315 | -3 | 2.84E-06 |
| mtChr1 | 226388 | 226421 | F | mtChr1 | 239540 | 239573 | -2 | 4.48E-06 |
| mtChr1 | 250410 | 250443 | F | mtChr1 | 309726 | 309759 | -2 | 4.48E-06 |
| mtChr1 | 118103 | 118133 | P | mtChr1 | 186972 | 187002 | -1 | 5.43E-06 |
| mtChr1 | 196647 | 196677 | F | mtChr1 | 280264 | 280294 | -1 | 5.43E-06 |
| mtChr1 | 196647 | 196677 | F | mtChr1 | 359147 | 359177 | -1 | 5.43E-06 |
| mtChr1 | 37595 | 37630 | F | mtChr1 | 421282 | 421317 | -3 | 1.04E-05 |
| mtChr1 | 283400 | 283435 | F | mtChr1 | 391902 | 391937 | -3 | 1.04E-05 |
| mtChr1 | 362283 | 362318 | F | mtChr1 | 391902 | 391937 | -3 | 1.04E-05 |
| mtChr1 | 48752 | 48784 | P | mtChr1 | 286829 | 286861 | -2 | 1.68E-05 |
| mtChr1 | 48752 | 48784 | P | mtChr1 | 365712 | 365744 | -2 | 1.68E-05 |
| mtChr1 | 48752 | 48784 | F | mtChr1 | 439923 | 439955 | -2 | 1.68E-05 |
| mtChr1 | 158688 | 158720 | P | mtChr1 | 229101 | 229133 | -2 | 1.68E-05 |
| mtChr1 | 169720 | 169752 | P | mtChr1 | 234437 | 234469 | -2 | 1.68E-05 |
| mtChr1 | 276445 | 276477 | P | mtChr1 | 306187 | 306219 | -2 | 1.68E-05 |
| mtChr1 | 276455 | 276487 | P | mtChr1 | 424000 | 424032 | -2 | 1.68E-05 |
| mtChr1 | 306187 | 306219 | P | mtChr1 | 355328 | 355360 | -2 | 1.68E-05 |
| mtChr1 | 355338 | 355370 | P | mtChr1 | 424000 | 424032 | -2 | 1.68E-05 |
| mtChr1 | 359 | 393 | F | mtChr1 | 145122 | 145156 | -3 | 3.81E-05 |
| mtChr1 | 8760 | 8794 | P | mtChr1 | 306158 | 306192 | -3 | 3.81E-05 |
| mtChr1 | 276461 | 276495 | P | mtChr1 | 388541 | 388575 | -3 | 3.81E-05 |
| mtChr1 | 286679 | 286713 | F | mtChr1 | 495943 | 495977 | -3 | 3.81E-05 |
| mtChr1 | 305944 | 305978 | F | mtChr1 | 481060 | 481094 | -3 | 3.81E-05 |
| mtChr1 | 309760 | 309794 | F | mtChr1 | 329385 | 329419 | -3 | 3.81E-05 |
| mtChr1 | 310922 | 310956 | F | mtChr1 | 424339 | 424373 | -3 | 3.81E-05 |
| mtChr1 | 310930 | 310964 | F | mtChr1 | 424347 | 424381 | -3 | 3.81E-05 |
| mtChr1 | 355344 | 355378 | P | mtChr1 | 388541 | 388575 | -3 | 3.81E-05 |
| mtChr1 | 365562 | 365596 | F | mtChr1 | 495943 | 495977 | -3 | 3.81E-05 |
| mtChr1 | 440071 | 440105 | P | mtChr1 | 495943 | 495977 | -3 | 3.81E-05 |
| mtChr1 | 8199 | 8230 | F | mtChr1 | 37950 | 37981 | -2 | 6.31E-05 |
| mtChr1 | 37291 | 37322 | P | mtChr1 | 96550 | 96581 | -2 | 6.31E-05 |
| mtChr1 | 37291 | 37322 | F | mtChr1 | 412585 | 412616 | -2 | 6.31E-05 |
| mtChr1 | 37415 | 37446 | F | mtChr1 | 151400 | 151431 | -2 | 6.31E-05 |
| mtChr1 | 37700 | 37731 | F | mtChr1 | 423127 | 423158 | -2 | 6.31E-05 |
| mtChr1 | 51573 | 51604 | P | mtChr1 | 401355 | 401386 | -2 | 6.31E-05 |
| mtChr1 | 96427 | 96458 | P | mtChr1 | 151400 | 151431 | -2 | 6.31E-05 |
| mtChr1 | 117031 | 117062 | F | mtChr1 | 277180 | 277211 | -2 | 6.31E-05 |
| mtChr1 | 117031 | 117062 | F | mtChr1 | 356063 | 356094 | -2 | 6.31E-05 |
| mtChr1 | 151400 | 151431 | F | mtChr1 | 412708 | 412739 | -2 | 6.31E-05 |
| mtChr1 | 182293 | 182324 | F | mtChr1 | 272380 | 272411 | -2 | 6.31E-05 |
| mtChr1 | 182293 | 182324 | F | mtChr1 | 351263 | 351294 | -2 | 6.31E-05 |
| mtChr1 | 182642 | 182673 | F | mtChr1 | 283100 | 283131 | -2 | 6.31E-05 |
| mtChr1 | 182642 | 182673 | F | mtChr1 | 361983 | 362014 | -2 | 6.31E-05 |
| mtChr1 | 421319 | 421350 | F | mtChr1 | 421340 | 421371 | -2 | 6.31E-05 |
| mtChr1 | 8776 | 8809 | P | mtChr1 | 306143 | 306176 | -3 | 1.39E-04 |
| mtChr1 | 170508 | 170541 | P | mtChr1 | 276445 | 276478 | -3 | 1.39E-04 |
| mtChr1 | 170508 | 170541 | P | mtChr1 | 355328 | 355361 | -3 | 1.39E-04 |
| mtChr1 | 221893 | 221926 | P | mtChr1 | 441172 | 441205 | -3 | 1.39E-04 |
| mtChr1 | 253156 | 253189 | F | mtChr1 | 282927 | 282960 | -3 | 1.39E-04 |
| mtChr1 | 253156 | 253189 | F | mtChr1 | 361810 | 361843 | -3 | 1.39E-04 |
| mtChr1 | 276337 | 276370 | P | mtChr1 | 306282 | 306315 | -3 | 1.39E-04 |
| mtChr1 | 276445 | 276478 | F | mtChr1 | 480289 | 480322 | -3 | 1.39E-04 |
| mtChr1 | 282927 | 282960 | F | mtChr1 | 332039 | 332072 | -3 | 1.39E-04 |
| mtChr1 | 306282 | 306315 | P | mtChr1 | 355220 | 355253 | -3 | 1.39E-04 |
| mtChr1 | 311160 | 311193 | F | mtChr1 | 424593 | 424626 | -3 | 1.39E-04 |
| mtChr1 | 332039 | 332072 | F | mtChr1 | 361810 | 361843 | -3 | 1.39E-04 |
| mtChr1 | 355328 | 355361 | F | mtChr1 | 480289 | 480322 | -3 | 1.39E-04 |
| mtChr1 | 14001 | 14031 | P | mtChr1 | 465348 | 465378 | -2 | 2.36E-04 |
| mtChr1 | 26572 | 26602 | F | mtChr1 | 260544 | 260574 | -2 | 2.36E-04 |
| mtChr1 | 26572 | 26602 | F | mtChr1 | 339427 | 339457 | -2 | 2.36E-04 |
| mtChr1 | 41984 | 42014 | P | mtChr1 | 141040 | 141070 | -2 | 2.36E-04 |
| mtChr1 | 49994 | 50024 | P | mtChr1 | 403656 | 403686 | -2 | 2.36E-04 |
| mtChr1 | 79046 | 79076 | F | mtChr1 | 254681 | 254711 | -2 | 2.36E-04 |
| mtChr1 | 79046 | 79076 | F | mtChr1 | 333564 | 333594 | -2 | 2.36E-04 |
| mtChr1 | 94502 | 94532 | P | mtChr1 | 154367 | 154397 | -2 | 2.36E-04 |
| mtChr1 | 94650 | 94680 | F | mtChr1 | 465888 | 465918 | -2 | 2.36E-04 |
| mtChr1 | 96269 | 96299 | P | mtChr1 | 388039 | 388069 | -2 | 2.36E-04 |
| mtChr1 | 111562 | 111592 | P | mtChr1 | 485182 | 485212 | -2 | 2.36E-04 |
| mtChr1 | 137022 | 137052 | F | mtChr1 | 190158 | 190188 | -2 | 2.36E-04 |
| mtChr1 | 137022 | 137052 | P | mtChr1 | 241395 | 241425 | -2 | 2.36E-04 |
| mtChr1 | 162855 | 162885 | P | mtChr1 | 458688 | 458718 | -2 | 2.36E-04 |
| mtChr1 | 172484 | 172514 | F | mtChr1 | 432031 | 432061 | -2 | 2.36E-04 |
| mtChr1 | 221410 | 221440 | F | mtChr1 | 267521 | 267551 | -2 | 2.36E-04 |
| mtChr1 | 221410 | 221440 | F | mtChr1 | 346404 | 346434 | -2 | 2.36E-04 |
| mtChr1 | 253171 | 253201 | P | mtChr1 | 377982 | 378012 | -2 | 2.36E-04 |
| mtChr1 | 253406 | 253436 | F | mtChr1 | 292488 | 292518 | -2 | 2.36E-04 |
| mtChr1 | 253406 | 253436 | F | mtChr1 | 371371 | 371401 | -2 | 2.36E-04 |
| mtChr1 | 255099 | 255129 | F | mtChr1 | 455303 | 455333 | -2 | 2.36E-04 |
| mtChr1 | 276465 | 276495 | P | mtChr1 | 423992 | 424022 | -2 | 2.36E-04 |
| mtChr1 | 292488 | 292518 | F | mtChr1 | 332289 | 332319 | -2 | 2.36E-04 |
| mtChr1 | 306448 | 306478 | F | mtChr1 | 408018 | 408048 | -2 | 2.36E-04 |
| mtChr1 | 332054 | 332084 | P | mtChr1 | 377982 | 378012 | -2 | 2.36E-04 |
| mtChr1 | 332289 | 332319 | F | mtChr1 | 371371 | 371401 | -2 | 2.36E-04 |
| mtChr1 | 333982 | 334012 | F | mtChr1 | 455303 | 455333 | -2 | 2.36E-04 |
| mtChr1 | 355348 | 355378 | P | mtChr1 | 423992 | 424022 | -2 | 2.36E-04 |
| mtChr1 | 388039 | 388069 | F | mtChr1 | 412867 | 412897 | -2 | 2.36E-04 |
| mtChr1 | 388495 | 388525 | F | mtChr1 | 408017 | 408047 | -2 | 2.36E-04 |
| mtChr1 | 414486 | 414516 | P | mtChr1 | 465888 | 465918 | -2 | 2.36E-04 |
| mtChr1 | 432031 | 432061 | F | mtChr1 | 447158 | 447188 | -2 | 2.36E-04 |
| mtChr1 | 432031 | 432061 | P | mtChr1 | 478316 | 478346 | -2 | 2.36E-04 |
| mtChr1 | 440601 | 440631 | P | mtChr1 | 450644 | 450674 | -2 | 2.36E-04 |
| mtChr1 | 15056 | 15088 | F | mtChr1 | 179115 | 179147 | -3 | 5.05E-04 |
| mtChr1 | 17367 | 17399 | P | mtChr1 | 489198 | 489230 | -3 | 5.05E-04 |
| mtChr1 | 28570 | 28602 | F | mtChr1 | 306386 | 306418 | -3 | 5.05E-04 |
| mtChr1 | 50686 | 50718 | F | mtChr1 | 468481 | 468513 | -3 | 5.05E-04 |
| mtChr1 | 94338 | 94370 | F | mtChr1 | 432119 | 432151 | -3 | 5.05E-04 |
| mtChr1 | 108504 | 108536 | F | mtChr1 | 182074 | 182106 | -3 | 5.05E-04 |
| mtChr1 | 110807 | 110839 | F | mtChr1 | 320398 | 320430 | -3 | 5.05E-04 |
| mtChr1 | 138242 | 138274 | F | mtChr1 | 143898 | 143930 | -3 | 5.05E-04 |
| mtChr1 | 179044 | 179076 | F | mtChr1 | 179115 | 179147 | -3 | 5.05E-04 |
| mtChr1 | 276430 | 276462 | P | mtChr1 | 424025 | 424057 | -3 | 5.05E-04 |
| mtChr1 | 276508 | 276540 | P | mtChr1 | 388496 | 388528 | -3 | 5.05E-04 |
| mtChr1 | 276511 | 276543 | P | mtChr1 | 292485 | 292517 | -3 | 5.05E-04 |
| mtChr1 | 276511 | 276543 | P | mtChr1 | 371368 | 371400 | -3 | 5.05E-04 |
| mtChr1 | 276511 | 276543 | P | mtChr1 | 408015 | 408047 | -3 | 5.05E-04 |
| mtChr1 | 292488 | 292520 | P | mtChr1 | 355391 | 355423 | -3 | 5.05E-04 |
| mtChr1 | 306386 | 306418 | F | mtChr1 | 309885 | 309917 | -3 | 5.05E-04 |
| mtChr1 | 306498 | 306530 | F | mtChr1 | 423997 | 424029 | -3 | 5.05E-04 |
| mtChr1 | 355313 | 355345 | P | mtChr1 | 424025 | 424057 | -3 | 5.05E-04 |
| mtChr1 | 355391 | 355423 | P | mtChr1 | 388496 | 388528 | -3 | 5.05E-04 |
| mtChr1 | 355394 | 355426 | P | mtChr1 | 371368 | 371400 | -3 | 5.05E-04 |
| mtChr1 | 355394 | 355426 | P | mtChr1 | 408015 | 408047 | -3 | 5.05E-04 |
| mtChr1 | 388546 | 388578 | F | mtChr1 | 423997 | 424029 | -3 | 5.05E-04 |
| mtChr1 | 414796 | 414828 | P | mtChr1 | 432119 | 432151 | -3 | 5.05E-04 |
| mtChr1 | 425 | 456 | F | mtChr1 | 84409 | 84440 | -3 | 1.83E-03 |
| mtChr1 | 9042 | 9073 | F | mtChr1 | 255332 | 255363 | -3 | 1.83E-03 |
| mtChr1 | 9042 | 9073 | F | mtChr1 | 334215 | 334246 | -3 | 1.83E-03 |
| mtChr1 | 14994 | 15025 | F | mtChr1 | 179124 | 179155 | -3 | 1.83E-03 |
| mtChr1 | 37592 | 37623 | F | mtChr1 | 288689 | 288720 | -3 | 1.83E-03 |
| mtChr1 | 37592 | 37623 | F | mtChr1 | 367572 | 367603 | -3 | 1.83E-03 |
| mtChr1 | 37592 | 37623 | P | mtChr1 | 438064 | 438095 | -3 | 1.83E-03 |
| mtChr1 | 38081 | 38112 | F | mtChr1 | 145467 | 145498 | -3 | 1.83E-03 |
| mtChr1 | 73460 | 73491 | F | mtChr1 | 172836 | 172867 | -3 | 1.83E-03 |
| mtChr1 | 73460 | 73491 | F | mtChr1 | 447510 | 447541 | -3 | 1.83E-03 |
| mtChr1 | 73460 | 73491 | P | mtChr1 | 477963 | 477994 | -3 | 1.83E-03 |
| mtChr1 | 81055 | 81086 | P | mtChr1 | 250405 | 250436 | -3 | 1.83E-03 |
| mtChr1 | 116081 | 116112 | F | mtChr1 | 265258 | 265289 | -3 | 1.83E-03 |
| mtChr1 | 116081 | 116112 | F | mtChr1 | 344141 | 344172 | -3 | 1.83E-03 |
| mtChr1 | 117091 | 117122 | F | mtChr1 | 277240 | 277271 | -3 | 1.83E-03 |
| mtChr1 | 117091 | 117122 | F | mtChr1 | 356123 | 356154 | -3 | 1.83E-03 |
| mtChr1 | 121229 | 121260 | P | mtChr1 | 173543 | 173574 | -3 | 1.83E-03 |
| mtChr1 | 121229 | 121260 | P | mtChr1 | 448217 | 448248 | -3 | 1.83E-03 |
| mtChr1 | 121229 | 121260 | F | mtChr1 | 477256 | 477287 | -3 | 1.83E-03 |
| mtChr1 | 139305 | 139336 | P | mtChr1 | 321477 | 321508 | -3 | 1.83E-03 |
| mtChr1 | 156088 | 156119 | F | mtChr1 | 379382 | 379413 | -3 | 1.83E-03 |
| mtChr1 | 169973 | 170004 | F | mtChr1 | 485042 | 485073 | -3 | 1.83E-03 |
| mtChr1 | 170494 | 170525 | F | mtChr1 | 306496 | 306527 | -3 | 1.83E-03 |
| mtChr1 | 250345 | 250376 | F | mtChr1 | 309666 | 309697 | -3 | 1.83E-03 |
| mtChr1 | 255645 | 255676 | F | mtChr1 | 307518 | 307549 | -3 | 1.83E-03 |
| mtChr1 | 260833 | 260864 | P | mtChr1 | 473007 | 473038 | -3 | 1.83E-03 |
| mtChr1 | 279331 | 279362 | F | mtChr1 | 458685 | 458716 | -3 | 1.83E-03 |
| mtChr1 | 285380 | 285411 | R | mtChr1 | 364261 | 364292 | -3 | 1.83E-03 |
| mtChr1 | 305954 | 305985 | F | mtChr1 | 481070 | 481101 | -3 | 1.83E-03 |
| mtChr1 | 306428 | 306459 | F | mtChr1 | 424960 | 424991 | -3 | 1.83E-03 |
| mtChr1 | 306496 | 306527 | P | mtChr1 | 480305 | 480336 | -3 | 1.83E-03 |
| mtChr1 | 307518 | 307549 | F | mtChr1 | 334528 | 334559 | -3 | 1.83E-03 |
| mtChr1 | 307518 | 307549 | F | mtChr1 | 488512 | 488543 | -3 | 1.83E-03 |
| mtChr1 | 339716 | 339747 | P | mtChr1 | 473007 | 473038 | -3 | 1.83E-03 |
| mtChr1 | 358214 | 358245 | F | mtChr1 | 458685 | 458716 | -3 | 1.83E-03 |
| mtChr1 | 388536 | 388567 | F | mtChr1 | 480839 | 480870 | -3 | 1.83E-03 |
| mtChr1 | 417312 | 417343 | P | mtChr1 | 469116 | 469147 | -3 | 1.83E-03 |
| mtChr1 | 417578 | 417609 | P | mtChr1 | 468740 | 468771 | -3 | 1.83E-03 |
| mtChr1 | 423776 | 423807 | P | mtChr1 | 464310 | 464341 | -3 | 1.83E-03 |
| mtChr1 | 3618 | 3648 | P | mtChr1 | 227980 | 228010 | -3 | 6.61E-03 |
| mtChr1 | 5849 | 5879 | F | mtChr1 | 139305 | 139335 | -3 | 6.61E-03 |
| mtChr1 | 8948 | 8978 | P | mtChr1 | 231418 | 231448 | -3 | 6.61E-03 |
| mtChr1 | 9034 | 9064 | F | mtChr1 | 255324 | 255354 | -3 | 6.61E-03 |
| mtChr1 | 9034 | 9064 | F | mtChr1 | 334207 | 334237 | -3 | 6.61E-03 |
| mtChr1 | 10649 | 10679 | P | mtChr1 | 149160 | 149190 | -3 | 6.61E-03 |
| mtChr1 | 17032 | 17062 | P | mtChr1 | 489465 | 489495 | -3 | 6.61E-03 |
| mtChr1 | 28583 | 28613 | F | mtChr1 | 254967 | 254997 | -3 | 6.61E-03 |
| mtChr1 | 28583 | 28613 | F | mtChr1 | 333850 | 333880 | -3 | 6.61E-03 |
| mtChr1 | 34661 | 34691 | F | mtChr1 | 328695 | 328725 | -3 | 6.61E-03 |
| mtChr1 | 35701 | 35731 | P | mtChr1 | 174450 | 174480 | -3 | 6.61E-03 |
| mtChr1 | 35701 | 35731 | F | mtChr1 | 476350 | 476380 | -3 | 6.61E-03 |
| mtChr1 | 38291 | 38321 | F | mtChr1 | 400562 | 400592 | -3 | 6.61E-03 |
| mtChr1 | 41633 | 41663 | F | mtChr1 | 275691 | 275721 | -3 | 6.61E-03 |
| mtChr1 | 41633 | 41663 | F | mtChr1 | 354574 | 354604 | -3 | 6.61E-03 |
| mtChr1 | 49258 | 49288 | P | mtChr1 | 305528 | 305558 | -3 | 6.61E-03 |
| mtChr1 | 52244 | 52274 | F | mtChr1 | 239328 | 239358 | -3 | 6.61E-03 |
| mtChr1 | 58341 | 58371 | F | mtChr1 | 400562 | 400592 | -3 | 6.61E-03 |
| mtChr1 | 61683 | 61713 | F | mtChr1 | 275691 | 275721 | -3 | 6.61E-03 |
| mtChr1 | 61683 | 61713 | F | mtChr1 | 354574 | 354604 | -3 | 6.61E-03 |
| mtChr1 | 78974 | 79004 | F | mtChr1 | 455807 | 455837 | -3 | 6.61E-03 |
| mtChr1 | 95816 | 95846 | F | mtChr1 | 145460 | 145490 | -3 | 6.61E-03 |
| mtChr1 | 96388 | 96418 | P | mtChr1 | 294261 | 294291 | -3 | 6.61E-03 |
| mtChr1 | 96388 | 96418 | P | mtChr1 | 373144 | 373174 | -3 | 6.61E-03 |
| mtChr1 | 106506 | 106536 | F | mtChr1 | 231123 | 231153 | -3 | 6.61E-03 |
| mtChr1 | 108575 | 108605 | F | mtChr1 | 182147 | 182177 | -3 | 6.61E-03 |
| mtChr1 | 114413 | 114443 | F | mtChr1 | 487356 | 487386 | -3 | 6.61E-03 |
| mtChr1 | 132443 | 132473 | F | mtChr1 | 144967 | 144997 | -3 | 6.61E-03 |
| mtChr1 | 133473 | 133503 | P | mtChr1 | 311353 | 311383 | -3 | 6.61E-03 |
| mtChr1 | 139026 | 139056 | P | mtChr1 | 308111 | 308141 | -3 | 6.61E-03 |
| mtChr1 | 145208 | 145238 | P | mtChr1 | 448792 | 448822 | -3 | 6.61E-03 |
| mtChr1 | 145460 | 145490 | F | mtChr1 | 179622 | 179652 | -3 | 6.61E-03 |
| mtChr1 | 145460 | 145490 | P | mtChr1 | 413320 | 413350 | -3 | 6.61E-03 |
| mtChr1 | 149079 | 149109 | P | mtChr1 | 248020 | 248050 | -3 | 6.61E-03 |
| mtChr1 | 150064 | 150094 | F | mtChr1 | 487356 | 487386 | -3 | 6.61E-03 |
| mtChr1 | 156377 | 156407 | P | mtChr1 | 415467 | 415497 | -3 | 6.61E-03 |
| mtChr1 | 163687 | 163717 | P | mtChr1 | 226599 | 226629 | -3 | 6.61E-03 |
| mtChr1 | 164276 | 164306 | P | mtChr1 | 190287 | 190317 | -3 | 6.61E-03 |
| mtChr1 | 164276 | 164306 | F | mtChr1 | 241266 | 241296 | -3 | 6.61E-03 |
| mtChr1 | 166053 | 166083 | F | mtChr1 | 169831 | 169861 | -3 | 6.61E-03 |
| mtChr1 | 192477 | 192507 | F | mtChr1 | 291374 | 291404 | -3 | 6.61E-03 |
| mtChr1 | 192477 | 192507 | F | mtChr1 | 370257 | 370287 | -3 | 6.61E-03 |
| mtChr1 | 217221 | 217251 | F | mtChr1 | 219527 | 219557 | -3 | 6.61E-03 |
| mtChr1 | 220925 | 220955 | F | mtChr1 | 452482 | 452512 | -3 | 6.61E-03 |
| mtChr1 | 250319 | 250349 | F | mtChr1 | 329277 | 329307 | -3 | 6.61E-03 |
| mtChr1 | 250345 | 250375 | F | mtChr1 | 329302 | 329332 | -3 | 6.61E-03 |
| mtChr1 | 250413 | 250443 | P | mtChr1 | 279423 | 279453 | -3 | 6.61E-03 |
| mtChr1 | 250413 | 250443 | P | mtChr1 | 358306 | 358336 | -3 | 6.61E-03 |
| mtChr1 | 250413 | 250443 | P | mtChr1 | 452514 | 452544 | -3 | 6.61E-03 |
| mtChr1 | 250448 | 250478 | F | mtChr1 | 329389 | 329419 | -3 | 6.61E-03 |
| mtChr1 | 253394 | 253424 | F | mtChr1 | 421659 | 421689 | -3 | 6.61E-03 |
| mtChr1 | 253406 | 253436 | F | mtChr1 | 388496 | 388526 | -3 | 6.61E-03 |
| mtChr1 | 254967 | 254997 | F | mtChr1 | 309898 | 309928 | -3 | 6.61E-03 |
| mtChr1 | 276412 | 276442 | P | mtChr1 | 424045 | 424075 | -3 | 6.61E-03 |
| mtChr1 | 276522 | 276552 | P | mtChr1 | 332277 | 332307 | -3 | 6.61E-03 |
| mtChr1 | 288870 | 288900 | F | mtChr1 | 422463 | 422493 | -3 | 6.61E-03 |
| mtChr1 | 294264 | 294294 | F | mtChr1 | 412751 | 412781 | -3 | 6.61E-03 |
| mtChr1 | 309898 | 309928 | F | mtChr1 | 333850 | 333880 | -3 | 6.61E-03 |
| mtChr1 | 332277 | 332307 | F | mtChr1 | 421659 | 421689 | -3 | 6.61E-03 |
| mtChr1 | 332289 | 332319 | F | mtChr1 | 388496 | 388526 | -3 | 6.61E-03 |
| mtChr1 | 355295 | 355325 | P | mtChr1 | 424045 | 424075 | -3 | 6.61E-03 |
| mtChr1 | 367753 | 367783 | F | mtChr1 | 422463 | 422493 | -3 | 6.61E-03 |
| mtChr1 | 373147 | 373177 | F | mtChr1 | 412751 | 412781 | -3 | 6.61E-03 |
| mtChr1 | 404838 | 404868 | F | mtChr1 | 448522 | 448552 | -3 | 6.61E-03 |
| mtChr1 | 417884 | 417914 | P | mtChr1 | 468384 | 468414 | -3 | 6.61E-03 |
