# Supplementary material for: Mitogenome Architecture and Evolutionary Insights in Origanum vulgare: Comparative Analysis of Structural Diversity and Repeat-Mediated Recombination
Source: Research Square preprint supplement (doi:10.21203/rs.3.rs-7070486/v1), 2025-07-24

**Figure S2 | Flowchart depicting study design.** This study first conducted HiFi sequencing and de novo assembly to generate a complete circular mitogenome of *O. vulgare*. Subsequent annotation characterized the genomic features, including PCGs, tRNAs, rRNAs and repeat elements. Computational predictions were then performed to identify RNA-editing sites. In parallel, the chloroplast genome was assembled and analyzed to detect MTPTs. Finally, phylogenetic analysis was carried out using mitochondrial PCGs from multiple species to resolve evolutionary relationships.

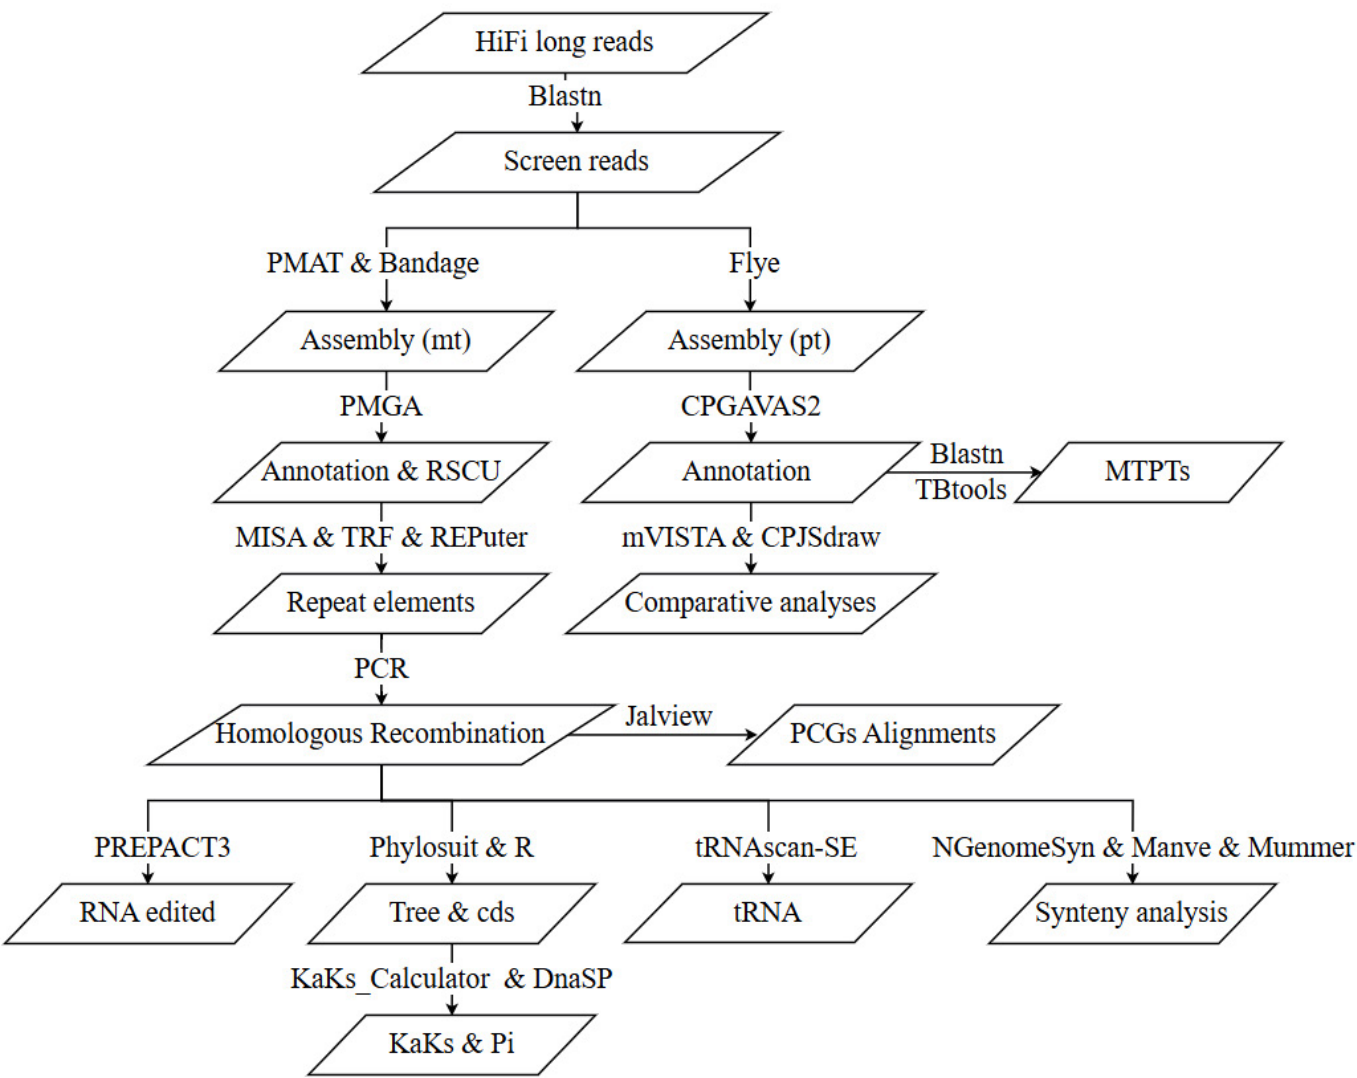

Supplement: Supplementary file 3 [file 132b82e9c42da01835867e9c.pdf]
