# Supplementary material for: Mitogenome Architecture and Evolutionary Insights in Origanum vulgare: Comparative Analysis of Structural Diversity and Repeat-Mediated Recombination
Source: Research Square preprint supplement (doi:10.21203/rs.3.rs-7070486/v1), 2025-07-24
Supplement: Supplementary file 4 [file 432d21510ac92206bd142ab3.docx]

**Table S9 | Selection pressures analysis results of the 18 PCGs of *Origanum vulgare* versus its relatiives.**

| **Gene** | **D.c.s.sativus** | **P.grandiflorus** | **S.miltiorrhiza** | **S.hydrophyllacea** | **H.occidentalis** | **P.viridis** |
| --- | --- | --- | --- | --- | --- | --- |
| *atp1* | 0.219077 | - | 0.515312 | 0.191532 | 0.208169 | 0.199941 |
| *atp4* | 1.06768 | 0.61317 | 0.480652 | 1.15346 | 1.01116 | 0.781262 |
| *atp8* | 0.621808 | 0.526655 | NA | 0.385732 | 0.323655 | 0.344842 |
| *ccmB* | 0.660548 | 0.633789 | NA | 1.31558 | 0.873049 | 1.25017 |
| *ccmC* | 0.760824 | 0.410285 | NA | 0.389619 | 0.599701 | 0.514906 |
| *ccmFC* | 0.534957 | 0.642381 | 0.468561 | 1.20102 | 0.599144 | 0.668596 |
| *ccmFN* | 0.744798 | 0.561288 | 0.695029 | 0.714342 | 0.705307 | 0.647239 |
| *cob* | 0.294386 | 0.149141 | 0.156594 | 0.189016 | 0.182279 | 0.173368 |
| *cox1* | 0.335691 | - | 0.445127 | 0.214785 | 0.279242 | 0.148997 |
| *cox3* | 0.202503 | 0.248759 | 0 | 0.222681 | 0.236571 | 0.397932 |
| *matR* | 0.758196 | - | 1.0688 | 0.67682 | 0.681385 | 0.570617 |
| *nad3* | 0.430401 | - | 0 | 0.407022 | 0.668209 | 0.501172 |
| *nad4L* | 0.0837609 | 0.154639 | NA | 0.245919 | 0.255101 | 0.851028 |
| *nad6* | 0.675518 | - | NA | 0.267883 | 0.392115 | 0.260038 |
| *nad9* | 0.330113 | 0.26801 | 2.09681 | 0.172706 | 0.361821 | 0.260391 |
| *rps12* | 0.723636 | - | 0.195082 | 0.364455 | 0.515523 | 0.324133 |
| *rps13* | 0.282059 | 0.470049 | 0.489731 | 0.724692 | 0.927995 | 0.586133 |
| *sdh4* | - | 0.54231 | - | 0.237169 | 0.290281 | 0.497855 |

| **Gene** | **P.quinquefolius** | **P.chinense** | **D.ibukiensis** | **L.angustifolia** | **C.nobile** | **S.muricatum** |
| --- | --- | --- | --- | --- | --- | --- |
| *atp1* | 0.222695 | 0.250079 | 0.222114 | 0.496485 | 0.228284 | 0.232347 |
| *atp4* | 1.15141 | NA | 1.06768 | NA | 1.00617 | 1.32448 |
| *atp8* | 0.456666 | 0.629487 | 0.689202 | 0.56009 | 0.324957 | - |
| *ccmB* | 0.566086 | 1.01591 | 0.590368 | NA | 1.5918 | 0.544987 |
| *ccmC* | 0.513288 | 0.39906 | 0.804534 | NA | 0.616925 | 0.432861 |
| *ccmFC* | 0.738546 | 0.577801 | 0.607361 | 0.234424 | 0.800434 | 0.444992 |
| *ccmFN* | 0.719745 | 0.354754 | 0.672862 | 1.19745 | 0.64197 | 0.622468 |
| *cob* | 0.189326 | 0.183393 | 0.261671 | 0.181219 | 0.220904 | 0.161954 |
| *cox1* | 0.405315 | 0.49643 | 0.269417 | 0.538522 | 0.268162 | 0.179362 |
| *cox3* | 0.205007 | 0 | 0.202843 | 0 | 0.21384 | 1.05178 |
| *matR* | 0.725266 | 0.817157 | 1.05471 | NA | 0.654856 | 0.693814 |
| *nad3* | 0.241482 | 0.220244 | 0.433059 | 0.307431 | 0.611387 | 0.248109 |
| *nad4L* | 0.255101 | NA | 0.083124 | NA | 0.122951 | 0.145559 |
| *nad6* | 0.525712 | 0.233422 | 0.66604 | 0.46779 | 0.573837 | 0.325834 |
| *nad9* | 0.418647 | 2.27104 | 0.274171 | 0.0988269 | 0.254814 | 0.569202 |
| *rps12* | 0.792295 | 0.335163 | 0.641218 | 0.250457 | 0.487597 | 0.698468 |
| *rps13* | - | NA | 0.355915 | 0.726702 | 0.604238 | 0.363773 |
| *sdh4* | - | - | 0.574118 | 0.50068 | - | 0.194747 |

| **Gene** | **H.speciosa** | **O.linearis** | **T.jasminoides** | **M.chamomilla** | **S.lycopersicum** | **I.aquatica** |
| --- | --- | --- | --- | --- | --- | --- |
| *atp1* | 0.309442 | 0.22196 | 0.232348 | 0.237779 | 0.203596 | 0.195526 |
| *atp4* | 1.92218 | 0.883838 | 1.45731 | 1.00617 | 1.3073 | 1.15055 |
| *atp8* | 0.523619 | 1.22886 | 0.450776 | 0.369358 | 0.349438 | 0.316413 |
| *ccmB* | 1.26615 | 0.468415 | 0.842672 | 1.07323 | 0.359096 | 0.619273 |
| *ccmC* | 0.630962 | 0.90281 | 0.601687 | 0.634209 | 0.529417 | 0.526487 |
| *ccmFC* | 0.844201 | 0.61884 | 1.12075 | 0.748219 | 0.457197 | - |
| *ccmFN* | 0.681835 | 0.699609 | 0.846969 | 0.707402 | 0.64769 | 0.782139 |
| *cob* | 0.151328 | 0.259128 | 0.160783 | 0.218347 | 0.163112 | 0.150177 |
| *cox1* | 0.173493 | 0.262394 | 0.210195 | 0.258478 | 0.190657 | 0.197637 |
| *cox3* | 0.736142 | 0.191594 | 0.518992 | 0.258776 | 1.05178 | 0.26379 |
| *matR* | 0.583821 | 1.04108 | 0.547836 | 0.711613 | 0.738526 | 0.730093 |
| *nad3* | 0.364039 | 0.394749 | 0.282757 | 0.611387 | 0.298026 | 0.355357 |
| *nad4L* | 0.218405 | 0.0744383 | 0.152961 | 0.122951 | 0.0965363 | 0.0837609 |
| *nad6* | 0.351809 | 0.675518 | 0.254921 | 0.547676 | 0.325834 | 0.388547 |
| *nad9* | 0.138206 | 0.337882 | 0.139711 | 0.283152 | 0.733863 | 0.396783 |
| *rps12* | 0.50795 | 0.58087 | 0.485061 | 0.488367 | 0.827935 | 0.682699 |
| *rps13* | 1.28535 | 0.365588 | 1.28535 | 0.622656 | 0.349112 | 1.23777 |
| *sdh4* | 0.1569 | 0.539915 | 0.251621 | - | 0.194747 | 0.265797 |

| **Gene** | **M.caulescens** | **S…rosmarinus** | **E.lindleyanum** | **A.foeniculum** | **L.ruthenicum** | **C.calisaya** |
| --- | --- | --- | --- | --- | --- | --- |
| *atp1* | 0.194775 | 0.79768 | 0.210957 | 0.219779 | 0.209043 | 0.208614 |
| *atp4* | 1.27845 | NA | 1.15226 | 1.06768 | 1.01916 | 0.865696 |
| *atp8* | 0.353345 | NA | 0.333728 | 0.636612 | 0.37774 | 0.368611 |
| *ccmB* | 0.359096 | NA | 1.15985 | 0.733803 | 0.359096 | 1.33456 |
| *ccmC* | 0.894329 | NA | 0.643817 | 0.767487 | 0.869694 | 0.586666 |
| *ccmFC* | 0.440367 | 0.50825 | 0.578143 | 0.454928 | 0.480506 | 1.10081 |
| *ccmFN* | 0.605973 | 0.354754 | 0.649999 | 0.751724 | 0.668052 | 0.697843 |
| *cob* | 0.167508 | 0.190841 | 0.206525 | 0.289146 | 0.176692 | 0.18549 |
| *cox1* | 0.206432 | 0.480447 | 0.279242 | 0.247739 | 0.171481 | 0.18574 |
| *cox3* | 0.705281 | 0 | 0.202788 | 0.192751 | 0.823963 | 0.12753 |
| *matR* | 0.636245 | 1.99411 | 0.664595 | 0.960894 | 0.686926 | 0.844892 |
| *nad3* | 0.298026 | 0 | 0.611387 | 0.479527 | 0.33053 | 0.534715 |
| *nad4L* | 0.144732 | NA | 0.122951 | 0.0485283 | 0.0965363 | 0.366836 |
| *nad6* | 0.355261 | NA | 0.642673 | 0.76193 | 0.37043 | 0.330561 |
| *nad9* | 0.262743 | 0.220483 | 0.419468 | 0.337882 | 0.887644 | 0.168686 |
| *rps12* | 0.631154 | 0.250457 | 0.515523 | 0.637709 | 0.698468 | 0.387534 |
| *rps13* | 0.481413 | 0.489731 | 0.728655 | 0.291247 | 0.468981 | 0.734074 |
| *sdh4* | 0.397232 | - | 0.542725 | 0.643573 | 0.194747 | 0.186857 |
