# Supplementary material for: Mitogenome Architecture and Evolutionary Insights in Origanum vulgare: Comparative Analysis of Structural Diversity and Repeat-Mediated Recombination
Source: Research Square preprint supplement (doi:10.21203/rs.3.rs-7070486/v1), 2025-07-24
Supplement: Supplementary file 6 [file 6e7882964403e8ff5cbdd032.docx]

**Table S8 | Changes in the hydrophobicity of amino acids induced by RNA-editing.**

| **Type** | **RNA-editing** | **Number** | **Percentage** |
| --- | --- | --- | --- |
| hydrophilic- hydrophilic | CAC(H) → TAC(Y) | 7 |  |
| CAT (H) → TAT (Y) | 15 |
| CGC (R) → TGC (C) | 6 |
| CGT (R) → TGT (C) | 20 |
| total | 48 | 12.15% |
| hydrophilic- hydrophobic | ACA (T) → ATA (I) | 5 |  |
| ACC (T) → ATC (I) | 2 |
| ACT (T) → ATT (I) | 9 |
| ACG (T) → ATG (M) | 2 |
| CGG (R) → TGG (W) | 26 |
| TCA (S) → TTA (L) | 62 |
| TCG (S) → TTG (L) | 31 |
| TCC (S) → TTC (F) | 25 |
| TCT (S) → TTT (F) | 29 |
| total | 191 | 48.35% |
| hydrophobic- hydrophilic | CCA (P) → TCA (S) | 3 |  |
| CCC (P) → TCC (S) | 4 |
| CCG (P) → TCG (S) | 3 |
| CCT (P) → TCT (S) | 19 |
| total | 29 | 7.34% |
| hydrophobic- hydrophobic | CCA (P) → CTA (L) | 27 |  |
| CCC (P) → CTC (L) | 12 |
| CCG (P) → CTG (L) | 24 |
| CCT (P) → CTT (L) | 20 |
| CCC (P) → TTC (F) | 4 |
| CCT (P) → TTT (F) | 6 |
| CTC (L) → TTC (F) | 5 |
| CTT (L) → TTT (F) | 13 |
| GCA (A) → GTA (V) | 1 |
| GCC (A) → GTC (V) | 4 |
| GCG (A) → GTG (V) | 5 |
| GCU (A) → GTG (V) | 6 |
|  | total | 127 | 32.15% |
|  | all | 395 | 100.00% |
