# Supplementary material for: Mitogenome Architecture and Evolutionary Insights in Origanum vulgare: Comparative Analysis of Structural Diversity and Repeat-Mediated Recombination
Source: Research Square preprint supplement (doi:10.21203/rs.3.rs-7070486/v1), 2025-07-24
Supplement: Supplementary file 7 [file 75419a80297bb05ac85cc7bc.docx]

**Table S11 | Closely related species of *Origanum vulgare.***

| **Order** | **Name** | **NCBI** |
| --- | --- | --- |
| Apiales | *Daucus carota subsp. sativus* | JQ248574.1 |
| *Anethum foeniculum* | PQ399811.1 |
| *Oenanthe linearis* | NC_088756.1 |
| *Dystaenia ibukiensis* | NC_082207.1 |
| *Panax quinquefolius* | NC_067574.1 |
| Asterales | *Helianthus occidentalis* | NC_058584.1 |
| *Platycodon grandiflorus* | MG775429.1 |
| *Eupatorium lindleyanum* | PQ157699.1 |
| *Chamaemelum nobile* | NC_083147.1 |
| *Matricaria chamomilla* | OR464824.1 |
| Solanales | *Solanum lycopersicum* | PP091929.1 |
| *Lycium ruthenicum* | PQ613844.1 |
| *Solanum muricatum* | NC_083979.1 |
| *Mandragora caulescens* | PP971602.1 |
| *Ipomoea aquatica* | PP885438.1 |
| Lamiales | *Lavandula angustifolia* | NC_082307.1 |
| *Platostoma chinense* | NC_069573.1 |
| *Salvia rosmarinus* | PP992923.1 |
| *Salvia miltiorrhiza* | NC_023209.1 |
| Gentianales | *Hancornia speciosa* | NC_085495.1 |
| *Trachelospermum jasminoides* | OR333986.1 |
| *Cinchona calisaya* | PQ963858.1 |
| *Psychotria viridis* | NC_066984.1 |
| *Scyphiphora hydrophyllacea* | NC_057654.1 |
