# Supplementary material for: Mitogenome Architecture and Evolutionary Insights in Origanum vulgare: Comparative Analysis of Structural Diversity and Repeat-Mediated Recombination
Source: Research Square preprint supplement (doi:10.21203/rs.3.rs-7070486/v1), 2025-07-24
Supplement: Supplementary file 8 [file 7c8f7d5926c7a3b468dffa80.docx]

**Table S10 | Collinearity analysis results of the mitochondrial genome of *Origanum vulgare* and its closely related species.**

| **query** | **database** | **identity (%)** | **alignment** | **mismatch** | **gap** | **q. start** | **q. end** | **d. start** | **d. end** | **e-value** | **score** |
| --- | --- | --- | --- | --- | --- | --- | --- | --- | --- | --- | --- |
| mtChr1 | NC_082307.1 | 96.739 | 5735 | 25 | 31 | 203652 | 209284 | 226816 | 232490 | 0 | 9406 |
| mtChr1 | NC_082307.1 | 97.933 | 5032 | 33 | 15 | 340159 | 345154 | 37136 | 32140 | 0 | 8650 |
| mtChr1 | NC_082307.1 | 97.933 | 5032 | 33 | 15 | 261276 | 266271 | 37136 | 32140 | 0 | 8650 |
| mtChr1 | NC_082307.1 | 97.061 | 4662 | 26 | 25 | 157612 | 162184 | 111418 | 116057 | 0 | 7747 |
| mtChr1 | NC_082307.1 | 96.476 | 4058 | 44 | 21 | 465770 | 469763 | 214670 | 210648 | 0 | 6610 |
| mtChr1 | NC_082307.1 | 97.756 | 3609 | 13 | 11 | 216275 | 219845 | 351761 | 348183 | 0 | 6154 |
| mtChr1 | NC_082307.1 | 97.106 | 3214 | 36 | 14 | 133960 | 137150 | 320219 | 317040 | 0 | 5367 |
| mtChr1 | NC_082307.1 | 96.513 | 3212 | 36 | 22 | 192636 | 195802 | 58133 | 61313 | 0 | 5241 |
| mtChr1 | NC_082307.1 | 96.503 | 3117 | 19 | 15 | 200620 | 203663 | 223403 | 226502 | 0 | 5070 |
| mtChr1 | NC_082307.1 | 96.099 | 2999 | 21 | 23 | 86948 | 89877 | 51817 | 54788 | 0 | 4802 |
| mtChr1 | NC_082307.1 | 98.298 | 1998 | 7 | 6 | 21847 | 23826 | 62463 | 64451 | 0 | 3476 |
| mtChr1 | NC_082307.1 | 97.242 | 1849 | 17 | 7 | 1788 | 3604 | 244555 | 246401 | 0 | 3101 |
| mtChr1 | NC_082307.1 | 97.803 | 1730 | 8 | 7 | 289630 | 291344 | 251595 | 253309 | 0 | 2957 |
| mtChr1 | NC_082307.1 | 97.803 | 1730 | 8 | 7 | 368513 | 370227 | 251595 | 253309 | 0 | 2957 |
| mtChr1 | NC_082307.1 | 98.871 | 1594 | 17 | 1 | 230771 | 232364 | 124075 | 122483 | 0 | 2843 |
| mtChr1 | NC_082307.1 | 96.462 | 1696 | 6 | 9 | 425786 | 427446 | 261047 | 259371 | 0 | 2750 |
| mtChr1 | NC_082307.1 | 98.612 | 1441 | 4 | 3 | 380218 | 381642 | 328740 | 327300 | 0 | 2536 |
| mtChr1 | NC_082307.1 | 97.645 | 1486 | 5 | 6 | 416724 | 418183 | 338426 | 339907 | 0 | 2523 |
| mtChr1 | NC_082307.1 | 97.106 | 1313 | 15 | 3 | 436802 | 438096 | 274603 | 273296 | 0 | 2193 |
| mtChr1 | NC_082307.1 | 96.143 | 1089 | 23 | 4 | 183823 | 184892 | 263499 | 262411 | 0 | 1760 |
| mtChr1 | NC_082307.1 | 97.589 | 1037 | 8 | 2 | 137151 | 138170 | 316886 | 315850 | 0 | 1760 |
| mtChr1 | NC_082307.1 | 97.535 | 1014 | 8 | 3 | 318728 | 319735 | 51684 | 50682 | 0 | 1718 |
| mtChr1 | NC_082307.1 | 90.279 | 1327 | 77 | 23 | 401100 | 402389 | 203630 | 204941 | 0 | 1688 |
| mtChr1 | NC_082307.1 | 93.255 | 1112 | 75 | 0 | 277540 | 278651 | 308386 | 309497 | 0 | 1639 |
| mtChr1 | NC_082307.1 | 93.255 | 1112 | 75 | 0 | 356423 | 357534 | 308386 | 309497 | 0 | 1639 |
| mtChr1 | NC_082307.1 | 96.872 | 959 | 12 | 7 | 232606 | 233547 | 179177 | 180134 | 0 | 1589 |
| mtChr1 | NC_082307.1 | 94.561 | 1048 | 10 | 10 | 44134 | 45161 | 276310 | 275290 | 0 | 1576 |
| mtChr1 | NC_082307.1 | 97.351 | 906 | 2 | 4 | 456394 | 457277 | 94837 | 93932 | 0 | 1520 |
| mtChr1 | NC_082307.1 | 99.497 | 796 | 4 | 0 | 233547 | 234342 | 180170 | 180965 | 0 | 1448 |
| mtChr1 | NC_082307.1 | 99.867 | 750 | 1 | 0 | 4680 | 5429 | 246593 | 247342 | 0 | 1380 |
| mtChr1 | NC_082307.1 | 99.73 | 742 | 2 | 0 | 101129 | 101870 | 97750 | 97009 | 0 | 1360 |
| mtChr1 | NC_082307.1 | 99.726 | 731 | 2 | 0 | 17456 | 18186 | 240321 | 239591 | 0 | 1339 |
| mtChr1 | NC_082307.1 | 99.32 | 735 | 4 | 1 | 421696 | 422429 | 261864 | 261130 | 0 | 1328 |
| mtChr1 | NC_082307.1 | 99.724 | 725 | 2 | 0 | 123595 | 124319 | 283426 | 284150 | 0 | 1328 |
| mtChr1 | NC_082307.1 | 93.685 | 871 | 22 | 8 | 457794 | 458634 | 206568 | 205701 | 0 | 1273 |
| mtChr1 | NC_082307.1 | 97.684 | 734 | 4 | 4 | 209904 | 210624 | 280958 | 281691 | 0 | 1249 |
| mtChr1 | NC_082307.1 | 94.09 | 846 | 8 | 8 | 104434 | 105261 | 307494 | 308315 | 0 | 1247 |
| mtChr1 | NC_082307.1 | 99.538 | 650 | 3 | 0 | 62001 | 62650 | 126010 | 126659 | 0 | 1184 |
| mtChr1 | NC_082307.1 | 94.293 | 771 | 44 | 0 | 275776 | 276546 | 14691 | 15461 | 0 | 1181 |
| mtChr1 | NC_082307.1 | 94.293 | 771 | 44 | 0 | 354659 | 355429 | 14691 | 15461 | 0 | 1181 |
| mtChr1 | NC_082307.1 | 97.654 | 682 | 5 | 4 | 487873 | 488554 | 25778 | 26448 | 0 | 1160 |
| mtChr1 | NC_082307.1 | 93.162 | 819 | 2 | 5 | 371966 | 372730 | 42070 | 41252 | 0 | 1153 |
| mtChr1 | NC_082307.1 | 93.162 | 819 | 2 | 5 | 293083 | 293847 | 42070 | 41252 | 0 | 1153 |
| mtChr1 | NC_082307.1 | 94.489 | 744 | 9 | 3 | 215304 | 216015 | 343517 | 344260 | 0 | 1118 |
| mtChr1 | NC_082307.1 | 93.872 | 767 | 4 | 6 | 185228 | 185957 | 276424 | 277184 | 0 | 1116 |
| mtChr1 | NC_082307.1 | 99.826 | 574 | 1 | 0 | 318081 | 318654 | 154446 | 155019 | 0 | 1055 |
| mtChr1 | NC_082307.1 | 97.405 | 578 | 3 | 2 | 445346 | 445911 | 28414 | 27837 | 0 | 974 |
| mtChr1 | NC_082307.1 | 93.912 | 657 | 20 | 5 | 489637 | 490274 | 354181 | 354836 | 0 | 974 |
| mtChr1 | NC_082307.1 | 98.192 | 553 | 2 | 1 | 18177 | 18721 | 239363 | 238811 | 0 | 959 |
| mtChr1 | NC_082307.1 | 97.679 | 560 | 8 | 2 | 16890 | 17444 | 240860 | 240301 | 0 | 957 |
| mtChr1 | NC_082307.1 | 95.623 | 594 | 6 | 6 | 79402 | 79980 | 132939 | 132351 | 0 | 935 |
| mtChr1 | NC_082307.1 | 91.982 | 661 | 10 | 10 | 476385 | 477016 | 277949 | 277303 | 0 | 887 |
| mtChr1 | NC_082307.1 | 91.982 | 661 | 10 | 10 | 173815 | 174446 | 277303 | 277949 | 0 | 887 |
| mtChr1 | NC_082307.1 | 93.453 | 611 | 7 | 6 | 200034 | 200621 | 222728 | 223328 | 0 | 876 |
| mtChr1 | NC_082307.1 | 90.634 | 662 | 3 | 6 | 409301 | 409920 | 30341 | 29697 | 0 | 824 |
| mtChr1 | NC_082307.1 | 90.634 | 662 | 3 | 6 | 99247 | 99866 | 29697 | 30341 | 0 | 824 |
| mtChr1 | NC_082307.1 | 93.173 | 542 | 15 | 9 | 455286 | 455817 | 133508 | 132979 | 0 | 776 |
| mtChr1 | NC_082307.1 | 90.369 | 623 | 8 | 10 | 266395 | 267001 | 72547 | 73133 | 0 | 771 |
| mtChr1 | NC_082307.1 | 90.369 | 623 | 8 | 10 | 345278 | 345884 | 72547 | 73133 | 0 | 771 |
| mtChr1 | NC_082307.1 | 92.95 | 539 | 15 | 10 | 309926 | 310454 | 133493 | 132968 | 0 | 763 |
| mtChr1 | NC_082307.1 | 90.112 | 627 | 2 | 9 | 72672 | 73244 | 201123 | 200503 | 0 | 760 |
| mtChr1 | NC_082307.1 | 93.846 | 520 | 1 | 3 | 429453 | 429963 | 222708 | 222211 | 0 | 754 |
| mtChr1 | NC_082307.1 | 93.294 | 507 | 7 | 3 | 345942 | 346433 | 25364 | 24870 | 0 | 723 |
| mtChr1 | NC_082307.1 | 93.294 | 507 | 7 | 3 | 267059 | 267550 | 25364 | 24870 | 0 | 723 |
| mtChr1 | NC_082307.1 | 91.033 | 513 | 5 | 9 | 283135 | 283625 | 291690 | 292183 | 0 | 654 |
| mtChr1 | NC_082307.1 | 91.033 | 513 | 5 | 9 | 362018 | 362508 | 291690 | 292183 | 0 | 654 |
| mtChr1 | NC_082307.1 | 84.63 | 540 | 10 | 10 | 420739 | 421217 | 186035 | 185508 | 5.15E-131 | 470 |
| mtChr1 | NC_069573.1 | 96.825 | 5733 | 32 | 34 | 203655 | 209284 | 276728 | 271043 | 0 | 9441 |
| mtChr1 | NC_069573.1 | 96.764 | 5408 | 30 | 33 | 203980 | 209284 | 48383 | 43018 | 0 | 8883 |
| mtChr1 | NC_069573.1 | 97.174 | 5202 | 35 | 27 | 261150 | 266271 | 453971 | 459140 | 0 | 8689 |
| mtChr1 | NC_069573.1 | 97.174 | 5202 | 35 | 27 | 340033 | 345154 | 453971 | 459140 | 0 | 8689 |
| mtChr1 | NC_069573.1 | 96.777 | 4095 | 20 | 20 | 157612 | 161601 | 193237 | 197324 | 0 | 6728 |
| mtChr1 | NC_069573.1 | 99.132 | 3226 | 15 | 2 | 216275 | 219487 | 64003 | 60778 | 0 | 5790 |
| mtChr1 | NC_069573.1 | 97.379 | 3396 | 34 | 14 | 133792 | 137150 | 374237 | 377614 | 0 | 5727 |
| mtChr1 | NC_069573.1 | 96.238 | 3190 | 49 | 19 | 192644 | 195808 | 126902 | 123759 | 0 | 5160 |
| mtChr1 | NC_069573.1 | 98.689 | 2823 | 11 | 4 | 466162 | 468968 | 212760 | 215572 | 0 | 4985 |
| mtChr1 | NC_069573.1 | 96.029 | 3123 | 20 | 19 | 200618 | 203663 | 280235 | 277140 | 0 | 4985 |
| mtChr1 | NC_069573.1 | 96.026 | 2642 | 69 | 7 | 54971 | 57585 | 199418 | 202050 | 0 | 4265 |
| mtChr1 | NC_069573.1 | 89.517 | 3167 | 129 | 48 | 18860 | 21831 | 286074 | 282916 | 0 | 3821 |
| mtChr1 | NC_069573.1 | 98.699 | 1998 | 5 | 5 | 21847 | 23826 | 14207 | 16201 | 0 | 3526 |
| mtChr1 | NC_069573.1 | 98.699 | 1998 | 5 | 5 | 21847 | 23826 | 242232 | 244226 | 0 | 3526 |
| mtChr1 | NC_069573.1 | 92.466 | 2137 | 112 | 21 | 250793 | 252913 | 418766 | 420869 | 0 | 3009 |
| mtChr1 | NC_069573.1 | 92.466 | 2137 | 112 | 21 | 329676 | 331796 | 418766 | 420869 | 0 | 3009 |
| mtChr1 | NC_069573.1 | 98.029 | 1725 | 13 | 6 | 368513 | 370227 | 169834 | 168121 | 0 | 2977 |
| mtChr1 | NC_069573.1 | 98.029 | 1725 | 13 | 6 | 289630 | 291344 | 169834 | 168121 | 0 | 2977 |
| mtChr1 | NC_069573.1 | 93.988 | 1996 | 68 | 15 | 401100 | 403057 | 480714 | 482695 | 0 | 2974 |
| mtChr1 | NC_069573.1 | 98.279 | 1569 | 20 | 4 | 230802 | 232364 | 228966 | 227399 | 0 | 2741 |
| mtChr1 | NC_069573.1 | 95.755 | 1696 | 12 | 8 | 425792 | 427446 | 474628 | 476304 | 0 | 2678 |
| mtChr1 | NC_069573.1 | 93.613 | 1738 | 56 | 8 | 273997 | 275679 | 204182 | 205919 | 0 | 2543 |
| mtChr1 | NC_069573.1 | 93.613 | 1738 | 56 | 8 | 352880 | 354562 | 204182 | 205919 | 0 | 2543 |
| mtChr1 | NC_069573.1 | 98.667 | 1275 | 7 | 4 | 380215 | 381480 | 22164 | 23437 | 0 | 2252 |
| mtChr1 | NC_069573.1 | 98.667 | 1275 | 7 | 4 | 380215 | 381480 | 250189 | 251462 | 0 | 2252 |
| mtChr1 | NC_069573.1 | 95.094 | 1386 | 12 | 7 | 88266 | 89597 | 486546 | 487929 | 0 | 2132 |
| mtChr1 | NC_069573.1 | 98.621 | 1015 | 7 | 1 | 318728 | 319735 | 485423 | 484409 | 0 | 1790 |
| mtChr1 | NC_069573.1 | 97.124 | 1043 | 3 | 5 | 35485 | 36511 | 422162 | 423193 | 0 | 1735 |
| mtChr1 | NC_069573.1 | 96.845 | 1046 | 7 | 4 | 137151 | 138170 | 377777 | 378822 | 0 | 1725 |
| mtChr1 | NC_069573.1 | 95.547 | 1078 | 30 | 3 | 183823 | 184892 | 95634 | 96701 | 0 | 1709 |
| mtChr1 | NC_069573.1 | 97.452 | 981 | 6 | 5 | 86948 | 87914 | 485557 | 486532 | 0 | 1655 |
| mtChr1 | NC_069573.1 | 92.863 | 1135 | 79 | 2 | 277540 | 278672 | 97328 | 98462 | 0 | 1646 |
| mtChr1 | NC_069573.1 | 92.863 | 1135 | 79 | 2 | 356423 | 357555 | 97328 | 98462 | 0 | 1646 |
| mtChr1 | NC_069573.1 | 96.711 | 973 | 14 | 2 | 1788 | 2742 | 83277 | 82305 | 0 | 1604 |
| mtChr1 | NC_069573.1 | 97.343 | 941 | 19 | 3 | 230802 | 231736 | 941 | 1 | 0 | 1594 |
| mtChr1 | NC_069573.1 | 97.343 | 941 | 19 | 3 | 230802 | 231736 | 296605 | 295665 | 0 | 1594 |
| mtChr1 | NC_069573.1 | 94.948 | 970 | 13 | 16 | 232606 | 233547 | 372090 | 373051 | 0 | 1487 |
| mtChr1 | NC_069573.1 | 98.15 | 811 | 6 | 1 | 2806 | 3607 | 82312 | 81502 | 0 | 1406 |
| mtChr1 | NC_069573.1 | 99.599 | 749 | 3 | 0 | 4681 | 5429 | 81307 | 80559 | 0 | 1367 |
| mtChr1 | NC_069573.1 | 97.506 | 802 | 14 | 3 | 233547 | 234342 | 373087 | 373888 | 0 | 1365 |
| mtChr1 | NC_069573.1 | 90.628 | 1099 | 1 | 11 | 443714 | 444749 | 416818 | 417877 | 0 | 1365 |
| mtChr1 | NC_069573.1 | 99.863 | 731 | 1 | 0 | 17456 | 18186 | 392601 | 391871 | 0 | 1345 |
| mtChr1 | NC_069573.1 | 99.455 | 734 | 4 | 0 | 421696 | 422429 | 473816 | 474549 | 0 | 1334 |
| mtChr1 | NC_069573.1 | 97.468 | 790 | 1 | 3 | 209901 | 210671 | 448531 | 447742 | 0 | 1330 |
| mtChr1 | NC_069573.1 | 99.31 | 725 | 5 | 0 | 123595 | 124319 | 75457 | 76181 | 0 | 1312 |
| mtChr1 | NC_069573.1 | 93.798 | 903 | 5 | 13 | 468964 | 469816 | 215797 | 216698 | 0 | 1310 |
| mtChr1 | NC_069573.1 | 99.58 | 715 | 3 | 0 | 421696 | 422410 | 438899 | 439613 | 0 | 1304 |
| mtChr1 | NC_069573.1 | 99.568 | 694 | 3 | 0 | 437361 | 438054 | 311210 | 311903 | 0 | 1266 |
| mtChr1 | NC_069573.1 | 97.312 | 744 | 16 | 1 | 101131 | 101870 | 172254 | 171511 | 0 | 1260 |
| mtChr1 | NC_069573.1 | 97.884 | 709 | 2 | 3 | 456582 | 457277 | 288863 | 288155 | 0 | 1214 |
| mtChr1 | NC_069573.1 | 97.801 | 682 | 9 | 3 | 487873 | 488554 | 48571 | 49246 | 0 | 1171 |
| mtChr1 | NC_069573.1 | 97.372 | 685 | 18 | 0 | 54971 | 55655 | 141239 | 141923 | 0 | 1166 |
| mtChr1 | NC_069573.1 | 97.372 | 685 | 18 | 0 | 54971 | 55655 | 493503 | 492819 | 0 | 1166 |
| mtChr1 | NC_069573.1 | 93.88 | 768 | 47 | 0 | 275776 | 276543 | 180598 | 181365 | 0 | 1158 |
| mtChr1 | NC_069573.1 | 93.88 | 768 | 47 | 0 | 354659 | 355426 | 180598 | 181365 | 0 | 1158 |
| mtChr1 | NC_069573.1 | 98.769 | 650 | 8 | 0 | 62004 | 62653 | 480073 | 479424 | 0 | 1157 |
| mtChr1 | NC_069573.1 | 93.04 | 819 | 3 | 5 | 293083 | 293847 | 329219 | 330037 | 0 | 1147 |
| mtChr1 | NC_069573.1 | 93.04 | 819 | 3 | 5 | 371966 | 372730 | 329219 | 330037 | 0 | 1147 |
| mtChr1 | NC_069573.1 | 96.75 | 677 | 5 | 4 | 479142 | 479810 | 418671 | 418004 | 0 | 1112 |
| mtChr1 | NC_069573.1 | 96.75 | 677 | 5 | 4 | 171021 | 171689 | 418004 | 418671 | 0 | 1112 |
| mtChr1 | NC_069573.1 | 95.915 | 661 | 11 | 2 | 457794 | 458438 | 335640 | 334980 | 0 | 1057 |
| mtChr1 | NC_069573.1 | 97.631 | 591 | 5 | 3 | 79402 | 79983 | 405814 | 405224 | 0 | 1005 |
| mtChr1 | NC_069573.1 | 94.153 | 667 | 22 | 8 | 199352 | 200002 | 203560 | 202895 | 0 | 1000 |
| mtChr1 | NC_069573.1 | 92.276 | 725 | 23 | 6 | 363800 | 364491 | 198293 | 197569 | 0 | 998 |
| mtChr1 | NC_069573.1 | 92.276 | 725 | 23 | 6 | 284917 | 285608 | 198293 | 197569 | 0 | 998 |
| mtChr1 | NC_069573.1 | 96.506 | 601 | 4 | 3 | 200038 | 200621 | 280915 | 280315 | 0 | 977 |
| mtChr1 | NC_069573.1 | 98.211 | 559 | 9 | 1 | 318086 | 318643 | 333163 | 333721 | 0.00E+00 | 976 |
| mtChr1 | NC_069573.1 | 97.468 | 553 | 1 | 2 | 18177 | 18721 | 391645 | 391098 | 0 | 931 |
| mtChr1 | NC_069573.1 | 97.308 | 520 | 5 | 2 | 16930 | 17444 | 393096 | 392581 | 0 | 874 |
| mtChr1 | NC_069573.1 | 95.144 | 556 | 5 | 1 | 455284 | 455817 | 406409 | 405854 | 0 | 857 |
| mtChr1 | NC_069573.1 | 95.1 | 551 | 4 | 2 | 309926 | 310454 | 406392 | 405843 | 0 | 846 |
| mtChr1 | NC_069573.1 | 91.139 | 632 | 9 | 9 | 345278 | 345884 | 101913 | 101304 | 0 | 813 |
| mtChr1 | NC_069573.1 | 91.139 | 632 | 9 | 9 | 266395 | 267001 | 101913 | 101304 | 0 | 813 |
| mtChr1 | NC_069573.1 | 95.192 | 520 | 14 | 6 | 429453 | 429969 | 280938 | 281449 | 0 | 811 |
| mtChr1 | NC_069573.1 | 94.62 | 539 | 3 | 6 | 442980 | 443498 | 425247 | 425779 | 0 | 811 |
| mtChr1 | NC_069573.1 | 94.62 | 539 | 3 | 6 | 442980 | 443498 | 460164 | 460696 | 0 | 811 |
| mtChr1 | NC_069573.1 | 91.015 | 601 | 6 | 12 | 131475 | 132046 | 84014 | 83433 | 0 | 767 |
| mtChr1 | PP992923.1 | 97.115 | 5720 | 25 | 38 | 203652 | 209284 | 59381 | 65047 | 0 | 9520 |
| mtChr1 | PP992923.1 | 97.93 | 5170 | 25 | 27 | 261150 | 266271 | 126577 | 131712 | 0 | 8879 |
| mtChr1 | PP992923.1 | 97.93 | 5170 | 25 | 27 | 340033 | 345154 | 126577 | 131712 | 0 | 8879 |
| mtChr1 | PP992923.1 | 97.656 | 4650 | 10 | 29 | 157612 | 162183 | 25095 | 29723 | 0 | 7891 |
| mtChr1 | PP992923.1 | 98.916 | 3598 | 6 | 11 | 216275 | 219845 | 79421 | 83012 | 0 | 6397 |
| mtChr1 | PP992923.1 | 98.075 | 3272 | 23 | 15 | 133897 | 137150 | 133900 | 137149 | 0 | 5657 |
| mtChr1 | PP992923.1 | 97.569 | 3250 | 10 | 13 | 465770 | 468968 | 17510 | 20741 | 0 | 5500 |
| mtChr1 | PP992923.1 | 97.591 | 3196 | 18 | 26 | 192643 | 195802 | 360657 | 363829 | 0 | 5421 |
| mtChr1 | PP992923.1 | 96.513 | 3126 | 14 | 23 | 200618 | 203663 | 55871 | 58981 | 0 | 5081 |
| mtChr1 | PP992923.1 | 93.372 | 3470 | 65 | 37 | 86271 | 89597 | 41340 | 37893 | 0 | 4981 |
| mtChr1 | PP992923.1 | 97.617 | 2560 | 13 | 16 | 380218 | 382734 | 117244 | 114690 | 0 | 4346 |
| mtChr1 | PP992923.1 | 91.073 | 3103 | 221 | 21 | 244112 | 247186 | 151116 | 148042 | 0 | 4145 |
| mtChr1 | PP992923.1 | 97.087 | 2163 | 4 | 13 | 280998 | 283114 | 316469 | 318618 | 0 | 3591 |
| mtChr1 | PP992923.1 | 97.087 | 2163 | 4 | 13 | 359881 | 361997 | 316469 | 318618 | 0 | 3591 |
| mtChr1 | PP992923.1 | 98.749 | 1998 | 4 | 5 | 21847 | 23826 | 258873 | 260867 | 0 | 3531 |
| mtChr1 | PP992923.1 | 92.202 | 2539 | 98 | 62 | 54834 | 57326 | 69001 | 71485 | 0 | 3500 |
| mtChr1 | PP992923.1 | 97.789 | 1854 | 5 | 6 | 1788 | 3607 | 324190 | 322339 | 0 | 3164 |
| mtChr1 | PP992923.1 | 98.396 | 1746 | 2 | 13 | 368513 | 370245 | 333950 | 332218 | 0 | 3046 |
| mtChr1 | PP992923.1 | 98.396 | 1746 | 2 | 13 | 289630 | 291362 | 333950 | 332218 | 0 | 3046 |
| mtChr1 | PP992923.1 | 95.766 | 1866 | 65 | 6 | 329676 | 331527 | 191824 | 189959 | 0 | 2996 |
| mtChr1 | PP992923.1 | 95.766 | 1866 | 65 | 6 | 250793 | 252644 | 191824 | 189959 | 0 | 2996 |
| mtChr1 | PP992923.1 | 99.153 | 1652 | 7 | 4 | 247168 | 248818 | 148024 | 146379 | 0 | 2966 |
| mtChr1 | PP992923.1 | 98.616 | 1662 | 8 | 4 | 318081 | 319735 | 313917 | 315570 | 0 | 2928 |
| mtChr1 | PP992923.1 | 99.239 | 1577 | 11 | 1 | 230788 | 232364 | 167958 | 166383 | 0 | 2844 |
| mtChr1 | PP992923.1 | 96.307 | 1706 | 10 | 8 | 425777 | 427446 | 187912 | 189600 | 0 | 2752 |
| mtChr1 | PP992923.1 | 91.991 | 1748 | 48 | 45 | 273998 | 275679 | 73760 | 75481 | 0 | 2368 |
| mtChr1 | PP992923.1 | 91.991 | 1748 | 48 | 45 | 352881 | 354562 | 73760 | 75481 | 0 | 2368 |
| mtChr1 | PP992923.1 | 97.639 | 1313 | 7 | 4 | 436802 | 438096 | 111012 | 109706 | 0 | 2231 |
| mtChr1 | PP992923.1 | 97.425 | 1204 | 5 | 5 | 403343 | 404528 | 171945 | 170750 | 0 | 2028 |
| mtChr1 | PP992923.1 | 97.69 | 1039 | 6 | 3 | 137149 | 138170 | 137307 | 138344 | 0 | 1770 |
| mtChr1 | PP992923.1 | 95.729 | 1077 | 33 | 8 | 233547 | 234614 | 202234 | 203306 | 0 | 1722 |
| mtChr1 | PP992923.1 | 95.992 | 1048 | 8 | 7 | 44134 | 45161 | 112746 | 111713 | 0 | 1672 |
| mtChr1 | PP992923.1 | 97.097 | 999 | 1 | 9 | 209695 | 210671 | 228355 | 227363 | 0 | 1659 |
| mtChr1 | PP992923.1 | 92.67 | 1146 | 80 | 2 | 277540 | 278681 | 125336 | 126481 | 0 | 1648 |
| mtChr1 | PP992923.1 | 92.67 | 1146 | 80 | 2 | 356423 | 357564 | 125336 | 126481 | 0 | 1648 |
| mtChr1 | PP992923.1 | 96.694 | 968 | 3 | 7 | 232606 | 233547 | 201234 | 202198 | 0 | 1583 |
| mtChr1 | PP992923.1 | 99.763 | 844 | 2 | 0 | 101027 | 101870 | 154609 | 155452 | 0 | 1548 |
| mtChr1 | PP992923.1 | 99.76 | 833 | 0 | 2 | 231124 | 231956 | 85683 | 86513 | 0 | 1526 |
| mtChr1 | PP992923.1 | 99.2 | 750 | 3 | 3 | 4680 | 5429 | 322151 | 321405 | 0 | 1349 |
| mtChr1 | PP992923.1 | 99.862 | 725 | 1 | 0 | 123595 | 124319 | 87800 | 88524 | 0 | 1334 |
| mtChr1 | PP992923.1 | 98.93 | 748 | 5 | 3 | 154899 | 155646 | 172305 | 173049 | 0 | 1334 |
| mtChr1 | PP992923.1 | 99.725 | 728 | 0 | 1 | 17456 | 18183 | 161406 | 162131 | 0 | 1332 |
| mtChr1 | PP992923.1 | 99.183 | 734 | 4 | 2 | 421696 | 422429 | 187107 | 187838 | 0 | 1321 |
| mtChr1 | PP992923.1 | 94.071 | 877 | 13 | 8 | 457794 | 458634 | 378219 | 379092 | 0 | 1295 |
| mtChr1 | PP992923.1 | 98.759 | 725 | 3 | 5 | 24062 | 24786 | 371241 | 370523 | 0 | 1284 |
| mtChr1 | PP992923.1 | 92.492 | 919 | 1 | 14 | 468964 | 469816 | 20969 | 21885 | 0 | 1253 |
| mtChr1 | PP992923.1 | 95.477 | 796 | 5 | 8 | 104434 | 105218 | 193840 | 193065 | 0 | 1242 |
| mtChr1 | PP992923.1 | 97.465 | 710 | 2 | 3 | 91089 | 91784 | 206654 | 207361 | 0 | 1197 |
| mtChr1 | PP992923.1 | 99.694 | 653 | 2 | 0 | 62001 | 62653 | 356383 | 355731 | 0 | 1195 |
| mtChr1 | PP992923.1 | 97.947 | 682 | 8 | 3 | 487873 | 488554 | 84797 | 84122 | 0 | 1177 |
| mtChr1 | PP992923.1 | 99.839 | 622 | 1 | 0 | 372109 | 372730 | 382290 | 381669 | 0 | 1144 |
| mtChr1 | PP992923.1 | 99.839 | 622 | 1 | 0 | 293226 | 293847 | 382290 | 381669 | 0 | 1144 |
| mtChr1 | PP992923.1 | 93.351 | 767 | 3 | 10 | 185228 | 185957 | 112855 | 113610 | 0 | 1090 |
| mtChr1 | PP992923.1 | 93.878 | 735 | 9 | 15 | 28629 | 29332 | 262497 | 261768 | 0 | 1075 |
| mtChr1 | PP992923.1 | 94.372 | 693 | 3 | 13 | 171021 | 171689 | 192618 | 191938 | 0 | 1031 |
| mtChr1 | PP992923.1 | 94.372 | 693 | 3 | 13 | 479142 | 479810 | 191938 | 192618 | 0 | 1031 |
| mtChr1 | PP992923.1 | 98.459 | 584 | 1 | 2 | 445343 | 445919 | 340812 | 341394 | 0 | 1022 |
| mtChr1 | PP992923.1 | 95.296 | 659 | 3 | 4 | 476385 | 477016 | 114386 | 113729 | 0 | 1020 |
| mtChr1 | PP992923.1 | 95.296 | 659 | 3 | 4 | 173815 | 174446 | 113729 | 114386 | 0 | 1020 |
| mtChr1 | PP992923.1 | 97.504 | 601 | 4 | 3 | 79397 | 79986 | 327763 | 328363 | 0 | 1016 |
| mtChr1 | PP992923.1 | 95.761 | 637 | 7 | 3 | 456010 | 456626 | 156015 | 156651 | 0 | 1009 |
| mtChr1 | PP992923.1 | 88.027 | 877 | 60 | 13 | 288730 | 289578 | 78410 | 79269 | 0 | 996 |
| mtChr1 | PP992923.1 | 88.027 | 877 | 60 | 13 | 367613 | 368461 | 78410 | 79269 | 0 | 996 |
| mtChr1 | PP992923.1 | 96.198 | 605 | 1 | 8 | 488857 | 489440 | 173139 | 173742 | 0 | 970 |
| mtChr1 | PP992923.1 | 95.345 | 623 | 6 | 6 | 266395 | 267001 | 299716 | 300331 | 0 | 968 |
| mtChr1 | PP992923.1 | 95.345 | 623 | 6 | 6 | 345278 | 345884 | 299716 | 300331 | 0 | 968 |
| mtChr1 | PP992923.1 | 96.16 | 599 | 6 | 6 | 200038 | 200621 | 55195 | 55791 | 0.00E+00 | 963 |
| mtChr1 | PP992923.1 | 98.192 | 553 | 1 | 2 | 18177 | 18721 | 162370 | 162921 | 0 | 957 |
| mtChr1 | PP992923.1 | 94.88 | 625 | 5 | 7 | 89587 | 90192 | 37838 | 37222 | 0 | 952 |
| mtChr1 | PP992923.1 | 98.308 | 532 | 2 | 4 | 267016 | 267547 | 372669 | 373193 | 0 | 926 |
| mtChr1 | PP992923.1 | 98.308 | 532 | 2 | 4 | 345899 | 346430 | 372669 | 373193 | 0 | 926 |
| mtChr1 | PP992923.1 | 96.625 | 563 | 7 | 5 | 16892 | 17444 | 160866 | 161426 | 0 | 924 |
| mtChr1 | PP992923.1 | 95.447 | 593 | 4 | 5 | 47487 | 48057 | 276419 | 277010 | 0 | 924 |
| mtChr1 | PP992923.1 | 95.804 | 572 | 2 | 1 | 80016 | 80565 | 156021 | 155450 | 0 | 904 |
| mtChr1 | PP992923.1 | 98.077 | 520 | 1 | 1 | 393526 | 394036 | 325488 | 326007 | 0 | 896 |
| mtChr1 | PP992923.1 | 98.077 | 520 | 1 | 1 | 67972 | 68482 | 326007 | 325488 | 0 | 896 |
| mtChr1 | PP992923.1 | 91.317 | 668 | 32 | 11 | 199352 | 200002 | 73142 | 72484 | 0 | 889 |
| mtChr1 | PP992923.1 | 95.863 | 556 | 1 | 1 | 455284 | 455817 | 327175 | 327730 | 0 | 880 |
| mtChr1 | PP992923.1 | 95.826 | 551 | 0 | 2 | 309926 | 310454 | 327192 | 327741 | 0 | 869 |
| mtChr1 | PP992923.1 | 93.761 | 577 | 4 | 8 | 131475 | 132027 | 324947 | 324379 | 0 | 837 |
| mtChr1 | PP992923.1 | 96.62 | 503 | 1 | 6 | 11021 | 11512 | 121621 | 122118 | 0 | 821 |
| mtChr1 | PP992923.1 | 96.267 | 509 | 1 | 4 | 429453 | 429952 | 55172 | 54673 | 0 | 819 |
| mtChr1 | PP992923.1 | 87.574 | 676 | 24 | 24 | 474076 | 474703 | 76840 | 76177 | 0 | 728 |
| mtChr1 | PP992923.1 | 87.574 | 676 | 24 | 24 | 176128 | 176755 | 76177 | 76840 | 0 | 728 |
| mtChr1 | PP992923.1 | 89.533 | 621 | 0 | 12 | 72672 | 73244 | 213855 | 214458 | 0 | 726 |
| mtChr1 | NC_023209.1 | 98.549 | 5168 | 10 | 10 | 340033 | 345154 | 432448 | 427300 | 0 | 9068 |
| mtChr1 | NC_023209.1 | 98.549 | 5168 | 10 | 10 | 261150 | 266271 | 432448 | 427300 | 0 | 9068 |
| mtChr1 | NC_023209.1 | 98.192 | 4647 | 5 | 9 | 157612 | 162184 | 70565 | 65924 | 0 | 8043 |
| mtChr1 | NC_023209.1 | 97.046 | 4096 | 17 | 16 | 205258 | 209284 | 323905 | 327965 | 0 | 6798 |
| mtChr1 | NC_023209.1 | 98.826 | 3579 | 9 | 6 | 216275 | 219820 | 34293 | 37871 | 0 | 6346 |
| mtChr1 | NC_023209.1 | 97.813 | 3704 | 27 | 17 | 133479 | 137150 | 5123 | 8804 | 0 | 6342 |
| mtChr1 | NC_023209.1 | 98.119 | 3243 | 2 | 9 | 465770 | 468968 | 79877 | 76650 | 0 | 5596 |
| mtChr1 | NC_023209.1 | 97.211 | 3119 | 8 | 12 | 200618 | 203663 | 318819 | 321931 | 0 | 5204 |
| mtChr1 | NC_023209.1 | 93.634 | 3456 | 72 | 33 | 86271 | 89597 | 453229 | 449793 | 0 | 5027 |
| mtChr1 | NC_023209.1 | 97.319 | 2760 | 14 | 8 | 210696 | 213396 | 150649 | 153407 | 0 | 4632 |
| mtChr1 | NC_023209.1 | 98.276 | 2088 | 8 | 6 | 380215 | 382281 | 484342 | 486422 | 0 | 3631 |
| mtChr1 | NC_023209.1 | 98.599 | 1998 | 7 | 5 | 21847 | 23826 | 472140 | 474134 | 0 | 3515 |
| mtChr1 | NC_023209.1 | 98.157 | 1845 | 5 | 4 | 1788 | 3607 | 288821 | 286981 | 0 | 3192 |
| mtChr1 | NC_023209.1 | 98.798 | 1747 | 3 | 4 | 368513 | 370245 | 180211 | 178469 | 0 | 3094 |
| mtChr1 | NC_023209.1 | 98.798 | 1747 | 3 | 4 | 289630 | 291362 | 180211 | 178469 | 0 | 3094 |
| mtChr1 | NC_023209.1 | 99.255 | 1610 | 10 | 2 | 230755 | 232364 | 101477 | 103084 | 0 | 2905 |
| mtChr1 | NC_023209.1 | 97.669 | 1673 | 9 | 5 | 318084 | 319735 | 265808 | 267471 | 0 | 2846 |
| mtChr1 | NC_023209.1 | 96.366 | 1706 | 12 | 6 | 425777 | 427446 | 344276 | 345967 | 0 | 2761 |
| mtChr1 | NC_023209.1 | 98.231 | 1583 | 5 | 4 | 203652 | 205226 | 322338 | 323905 | 0 | 2747 |
| mtChr1 | NC_023209.1 | 98.258 | 1550 | 12 | 5 | 194273 | 195808 | 274043 | 272495 | 0 | 2699 |
| mtChr1 | NC_023209.1 | 97.046 | 1557 | 31 | 6 | 391013 | 392563 | 436373 | 434826 | 0 | 2606 |
| mtChr1 | NC_023209.1 | 97.949 | 1463 | 4 | 3 | 416750 | 418186 | 335129 | 333667 | 0 | 2512 |
| mtChr1 | NC_023209.1 | 97.92 | 1442 | 10 | 6 | 192643 | 194079 | 275453 | 274027 | 0 | 2479 |
| mtChr1 | NC_023209.1 | 97.71 | 1310 | 7 | 3 | 436802 | 438093 | 29844 | 31148 | 0 | 2231 |
| mtChr1 | NC_023209.1 | 92.646 | 1591 | 8 | 10 | 490264 | 491750 | 157797 | 156212 | 0 | 2189 |
| mtChr1 | NC_023209.1 | 96.7 | 1303 | 3 | 6 | 456010 | 457277 | 144559 | 143262 | 0 | 2132 |
| mtChr1 | NC_023209.1 | 97.856 | 1166 | 2 | 4 | 427830 | 428973 | 154669 | 153505 | 0 | 1993 |
| mtChr1 | NC_023209.1 | 97.265 | 1170 | 2 | 4 | 102264 | 103403 | 149238 | 150407 | 0 | 1956 |
| mtChr1 | NC_023209.1 | 98.639 | 1029 | 5 | 3 | 137151 | 138170 | 8967 | 9995 | 0 | 1814 |
| mtChr1 | NC_023209.1 | 97.99 | 995 | 2 | 2 | 209695 | 210671 | 194169 | 193175 | 0 | 1711 |
| mtChr1 | NC_023209.1 | 94.787 | 1055 | 7 | 8 | 44134 | 45161 | 28100 | 29133 | 0 | 1600 |
| mtChr1 | NC_023209.1 | 96.865 | 957 | 10 | 7 | 232606 | 233547 | 206440 | 205489 | 0 | 1583 |
| mtChr1 | NC_023209.1 | 91.491 | 1140 | 95 | 1 | 277540 | 278679 | 19368 | 20505 | 0 | 1567 |
| mtChr1 | NC_023209.1 | 91.491 | 1140 | 95 | 1 | 356423 | 357562 | 19368 | 20505 | 0 | 1567 |
| mtChr1 | NC_023209.1 | 96.114 | 875 | 25 | 5 | 233547 | 234420 | 205453 | 204587 | 0 | 1419 |
| mtChr1 | NC_023209.1 | 99.236 | 785 | 5 | 1 | 101051 | 101834 | 139289 | 138505 | 0 | 1415 |
| mtChr1 | NC_023209.1 | 95.367 | 885 | 11 | 6 | 484408 | 485281 | 372676 | 371811 | 0 | 1380 |
| mtChr1 | NC_023209.1 | 99.598 | 746 | 3 | 0 | 4680 | 5425 | 286788 | 286043 | 0 | 1362 |
| mtChr1 | NC_023209.1 | 99.863 | 731 | 1 | 0 | 17456 | 18186 | 107895 | 107165 | 0 | 1345 |
| mtChr1 | NC_023209.1 | 99.455 | 734 | 4 | 0 | 421696 | 422429 | 343469 | 344202 | 0 | 1334 |
| mtChr1 | NC_023209.1 | 99.862 | 725 | 1 | 0 | 123595 | 124319 | 491454 | 490730 | 0 | 1334 |
| mtChr1 | NC_023209.1 | 94.582 | 849 | 36 | 3 | 401100 | 401938 | 43002 | 42154 | 0 | 1304 |
| mtChr1 | NC_023209.1 | 93.957 | 877 | 14 | 8 | 457794 | 458634 | 173614 | 172741 | 0 | 1290 |
| mtChr1 | NC_023209.1 | 92.057 | 919 | 0 | 12 | 468964 | 469816 | 76415 | 75504 | 0 | 1225 |
| mtChr1 | NC_023209.1 | 93.9 | 836 | 4 | 8 | 488857 | 489645 | 159630 | 158795 | 0 | 1218 |
| mtChr1 | NC_023209.1 | 99.385 | 650 | 4 | 0 | 62001 | 62650 | 43631 | 44280 | 0 | 1179 |
| mtChr1 | NC_023209.1 | 97.947 | 682 | 8 | 3 | 487873 | 488554 | 49621 | 50296 | 0 | 1177 |
| mtChr1 | NC_023209.1 | 94.364 | 763 | 41 | 2 | 275780 | 276541 | 383296 | 384057 | 0 | 1170 |
| mtChr1 | NC_023209.1 | 94.364 | 763 | 41 | 2 | 354663 | 355424 | 383296 | 384057 | 0 | 1170 |
| mtChr1 | NC_023209.1 | 96.117 | 721 | 4 | 3 | 139467 | 140169 | 283619 | 284333 | 0 | 1155 |
| mtChr1 | NC_023209.1 | 96.925 | 683 | 14 | 1 | 184217 | 184892 | 245617 | 246299 | 0 | 1138 |
| mtChr1 | NC_023209.1 | 92.804 | 806 | 9 | 7 | 293083 | 293847 | 169228 | 170025 | 0 | 1122 |
| mtChr1 | NC_023209.1 | 92.804 | 806 | 9 | 7 | 371966 | 372730 | 169228 | 170025 | 0 | 1122 |
| mtChr1 | NC_023209.1 | 93.351 | 767 | 5 | 8 | 185228 | 185957 | 27991 | 27234 | 0 | 1092 |
| mtChr1 | NC_023209.1 | 96.531 | 663 | 5 | 5 | 281294 | 281953 | 116897 | 117544 | 0 | 1081 |
| mtChr1 | NC_023209.1 | 96.531 | 663 | 5 | 5 | 360177 | 360836 | 116897 | 117544 | 0 | 1081 |
| mtChr1 | NC_023209.1 | 96.784 | 653 | 8 | 5 | 228556 | 229201 | 421750 | 422396 | 0 | 1077 |
| mtChr1 | NC_023209.1 | 95.441 | 658 | 7 | 5 | 489635 | 490274 | 158638 | 157986 | 0 | 1027 |
| mtChr1 | NC_023209.1 | 98.459 | 584 | 2 | 1 | 445343 | 445919 | 125914 | 126497 | 0 | 1022 |
| mtChr1 | NC_023209.1 | 97.338 | 601 | 5 | 3 | 79397 | 79986 | 292332 | 292932 | 0 | 1011 |
| mtChr1 | NC_023209.1 | 99.637 | 551 | 2 | 0 | 482370 | 482920 | 464084 | 463534 | 0 | 1007 |
| mtChr1 | NC_023209.1 | 99.637 | 551 | 2 | 0 | 296679 | 297229 | 463534 | 464084 | 0 | 1007 |
| mtChr1 | NC_023209.1 | 99.637 | 551 | 2 | 0 | 375562 | 376112 | 463534 | 464084 | 0 | 1007 |
| mtChr1 | NC_023209.1 | 96.591 | 616 | 6 | 2 | 90249 | 90849 | 469430 | 470045 | 0 | 1007 |
| mtChr1 | NC_023209.1 | 96.506 | 601 | 4 | 3 | 200038 | 200621 | 318139 | 318739 | 0 | 977 |
| mtChr1 | NC_023209.1 | 94.607 | 649 | 3 | 5 | 173818 | 174446 | 27111 | 26475 | 0 | 976 |
| mtChr1 | NC_023209.1 | 94.607 | 649 | 3 | 5 | 476385 | 477013 | 26475 | 27111 | 0.00E+00 | 976 |
| mtChr1 | NC_023209.1 | 98.373 | 553 | 1 | 1 | 18177 | 18721 | 106937 | 106385 | 0 | 965 |
| mtChr1 | NC_023209.1 | 95.04 | 625 | 7 | 4 | 89587 | 90192 | 449737 | 449118 | 0 | 961 |
| mtChr1 | NC_023209.1 | 95.717 | 607 | 7 | 5 | 111029 | 111627 | 14799 | 14204 | 0 | 959 |
| mtChr1 | NC_023209.1 | 94.703 | 623 | 4 | 7 | 382959 | 383552 | 378955 | 378333 | 0 | 941 |
| mtChr1 | NC_023209.1 | 96.263 | 562 | 15 | 1 | 402086 | 402641 | 42084 | 41523 | 0 | 917 |
| mtChr1 | NC_023209.1 | 98.462 | 520 | 3 | 1 | 16930 | 17444 | 108394 | 107875 | 0 | 911 |
| mtChr1 | NC_023209.1 | 98.462 | 520 | 3 | 1 | 16930 | 17444 | 309249 | 308730 | 0 | 911 |
| mtChr1 | NC_023209.1 | 95.797 | 571 | 2 | 1 | 80016 | 80564 | 144553 | 145123 | 0 | 902 |
| mtChr1 | NC_023209.1 | 95.471 | 552 | 6 | 10 | 455284 | 455817 | 291749 | 292299 | 0 | 863 |
| mtChr1 | NC_023209.1 | 95.612 | 547 | 4 | 11 | 309926 | 310454 | 291766 | 292310 | 0 | 859 |
| mtChr1 | NC_023209.1 | 96.198 | 526 | 1 | 5 | 393526 | 394036 | 290080 | 290601 | 0 | 843 |
| mtChr1 | NC_023209.1 | 96.198 | 526 | 1 | 5 | 67972 | 68482 | 290601 | 290080 | 0 | 843 |
| mtChr1 | NC_023209.1 | 85.099 | 859 | 91 | 17 | 288730 | 289578 | 342418 | 343249 | 0 | 843 |
| mtChr1 | NC_023209.1 | 85.099 | 859 | 91 | 17 | 367613 | 368461 | 342418 | 343249 | 0 | 843 |
| mtChr1 | NC_023209.1 | 90.69 | 623 | 10 | 11 | 345278 | 345884 | 190975 | 190385 | 0 | 785 |
| mtChr1 | NC_023209.1 | 90.69 | 623 | 10 | 11 | 266395 | 267001 | 190975 | 190385 | 0 | 785 |
| mtChr1 | NC_023209.1 | 91.259 | 572 | 2 | 9 | 131475 | 132027 | 289553 | 289011 | 0 | 736 |
| mtChr1 | NC_023209.1 | 89.655 | 551 | 9 | 9 | 31324 | 31843 | 245105 | 244572 | 0 | 658 |
| mtChr1 | NC_023209.1 | 76.877 | 826 | 155 | 14 | 168529 | 169330 | 237828 | 238641 | 2.64E-120 | 435 |
| mtChr1 | NC_023209.1 | 82.531 | 561 | 2 | 21 | 302996 | 303543 | 210944 | 210467 | 2.07E-111 | 405 |
