# Supplementary material for: Mitogenome Architecture and Evolutionary Insights in Origanum vulgare: Comparative Analysis of Structural Diversity and Repeat-Mediated Recombination
Source: Research Square preprint supplement (doi:10.21203/rs.3.rs-7070486/v1), 2025-07-24
Supplement: Supplementary file 9 [file aa77467a8a2b76aa16d6a6b7.docx]

**Table S3 | MISA in the mitochondrial genome of *Origanum vulgare.***

| **Chr** | **SSR type** | **SSR** | **size** | **start** | **end** |
| --- | --- | --- | --- | --- | --- |
| mtChr1 | p3 | (GCA)5 | 15 | 8669 | 8683 |
| mtChr1 | p1 | (A)12 | 12 | 109828 | 109839 |
| mtChr1 | p1 | (A)10 | 10 | 136855 | 136864 |
| mtChr1 | p2 | (AT)6 | 12 | 139845 | 139856 |
| mtChr1 | p2 | (AT)7 | 14 | 169801 | 169814 |
| mtChr1 | p3 | (ATT)5 | 15 | 188986 | 189000 |
| mtChr1 | c | (T)12gaattcacatgatatttgaaattctttttgttacacttctatcctagaatatttcttcctagtttgttt  gattaattaatcaaacattcctcggctttcattcgaaaagggggaagtt(A)13 | 143 | 235395 | 235537 |
| mtChr1 | p1 | (A)13 | 13 | 244087 | 244099 |
| mtChr1 | p2 | (CT)7 | 14 | 472339 | 472352 |
