# Supplementary material for: Mitogenome Architecture and Evolutionary Insights in Origanum vulgare: Comparative Analysis of Structural Diversity and Repeat-Mediated Recombination
Source: Research Square preprint supplement (doi:10.21203/rs.3.rs-7070486/v1), 2025-07-24
Supplement: Supplementary file 10 [file d65e800d69f208b1cffccb03.docx]

**Table S4 | Tandem repeats in the mitochondrial genome of *Origanum vulgare.***

| **Chr** | **Indices** | **Period Size** | **Copy Number** | **Consensus Size** | **Percent Matches** | **Percent Indels** | **Score** | **A** | **C** | **G** | **T** | **Entropy(0-2)** |
| --- | --- | --- | --- | --- | --- | --- | --- | --- | --- | --- | --- | --- |
| mtChr1 | 14943--15088 | 71 | 2.1 | 71 | 82 | 0 | 201 | 28 | 23 | 14 | 32 | 1.94 |
| mtChr1 | 17432--17458 | 13 | 2.1 | 13 | 100 | 0 | 54 | 22 | 18 | 44 | 14 | 1.86 |
| mtChr1 | 72093--72121 | 13 | 2.2 | 13 | 93 | 0 | 51 | 34 | 0 | 20 | 44 | 1.52 |
| mtChr1 | 139306--139357 | 26 | 2 | 26 | 84 | 0 | 76 | 9 | 28 | 25 | 36 | 1.87 |
| mtChr1 | 148917--148957 | 21 | 2 | 21 | 80 | 9 | 52 | 41 | 4 | 21 | 31 | 1.74 |
| mtChr1 | 173493--173654 | 71 | 2.3 | 72 | 72 | 4 | 182 | 41 | 11 | 19 | 26 | 1.86 |
| mtChr1 | 236748--236779 | 14 | 2.2 | 15 | 88 | 5 | 50 | 28 | 9 | 0 | 62 | 1.26 |
| mtChr1 | 246164--246194 | 15 | 2.1 | 15 | 100 | 0 | 62 | 41 | 0 | 19 | 38 | 1.51 |
| mtChr1 | 246164--246201 | 15 | 2.8 | 14 | 88 | 11 | 53 | 42 | 0 | 18 | 39 | 1.5 |
| mtChr1 | 291620--291648 | 15 | 1.9 | 15 | 92 | 0 | 51 | 31 | 13 | 24 | 31 | 1.94 |
| mtChr1 | 296002--296037 | 18 | 1.9 | 19 | 83 | 5 | 51 | 22 | 19 | 30 | 27 | 1.98 |
| mtChr1 | 304600--304635 | 16 | 2.2 | 17 | 85 | 5 | 51 | 30 | 16 | 22 | 30 | 1.96 |
| mtChr1 | 310305--310336 | 13 | 2.5 | 13 | 89 | 0 | 50 | 0 | 25 | 3 | 71 | 1 |
| mtChr1 | 370503--370531 | 15 | 1.9 | 15 | 92 | 0 | 51 | 31 | 13 | 24 | 31 | 1.94 |
| mtChr1 | 374885--374920 | 18 | 1.9 | 19 | 83 | 5 | 51 | 22 | 19 | 30 | 27 | 1.98 |
| mtChr1 | 384269--384308 | 18 | 2.2 | 19 | 86 | 4 | 59 | 30 | 2 | 32 | 35 | 1.71 |
| mtChr1 | 418312--418351 | 18 | 2.2 | 19 | 86 | 4 | 59 | 30 | 2 | 32 | 35 | 1.71 |
| mtChr1 | 421320--421372 | 21 | 2.5 | 21 | 90 | 0 | 92 | 49 | 13 | 22 | 15 | 1.79 |
| mtChr1 | 421374--421417 | 21 | 2.1 | 21 | 82 | 0 | 60 | 43 | 29 | 13 | 13 | 1.83 |
| mtChr1 | 423217--423274 | 23 | 2.5 | 23 | 80 | 2 | 72 | 50 | 10 | 29 | 10 | 1.7 |
| mtChr1 | 437678--437709 | 16 | 2 | 16 | 87 | 0 | 50 | 28 | 21 | 15 | 34 | 1.94 |
| mtChr1 | 448167--448328 | 71 | 2.3 | 72 | 72 | 4 | 182 | 41 | 11 | 19 | 26 | 1.86 |
| mtChr1 | 455679--455710 | 13 | 2.5 | 13 | 89 | 0 | 50 | 0 | 25 | 3 | 71 | 1 |
| mtChr1 | 477183--477314 | 71 | 1.9 | 71 | 83 | 0 | 194 | 27 | 20 | 13 | 38 | 1.9 |
| mtChr1 | 477176--477338 | 71 | 2.3 | 71 | 73 | 3 | 182 | 26 | 19 | 12 | 41 | 1.87 |
| mtChr1 | 483562--483597 | 18 | 1.9 | 19 | 83 | 5 | 51 | 27 | 30 | 19 | 22 | 1.98 |
