# Supplementary material for: Mitogenome Architecture and Evolutionary Insights in Origanum vulgare: Comparative Analysis of Structural Diversity and Repeat-Mediated Recombination
Source: Research Square preprint supplement (doi:10.21203/rs.3.rs-7070486/v1), 2025-07-24
Supplement: Supplementary file 11 [file f9de866eb94364e6f70c7175.docx]

**Table S6 | Mitochondrial-Plastid DNA Transfer of *Origanum vulgare.***

| **query** | **database** | **identity (%)** | **alignment** | **mismatch** | **gap** | **q. start** | **q. end** | **d. start** | **d. end** | **e-value** | **score** |
| --- | --- | --- | --- | --- | --- | --- | --- | --- | --- | --- | --- |
| ptDNA | mtDNA | 98.825 | 5105 | 15 | 7 | 20227 | 25329 | 52544 | 57605 | 0 | 9053 |
| ptDNA | mtDNA | 97.931 | 2755 | 3 | 6 | 106394 | 109148 | 213396 | 210696 | 0 | 4723 |
| ptDNA | mtDNA | 97.931 | 2755 | 3 | 6 | 55646 | 58400 | 210696 | 213396 | 0 | 4723 |
| ptDNA | mtDNA | 93.438 | 3170 | 11 | 20 | 118594 | 121762 | 18858 | 21831 | 0 | 4519 |
| ptDNA | mtDNA | 99.694 | 1959 | 5 | 1 | 134137 | 136095 | 401100 | 403057 | 0 | 3583 |
| ptDNA | mtDNA | 98.156 | 1952 | 2 | 4 | 6941 | 8881 | 222882 | 224810 | 0 | 3374 |
| ptDNA | mtDNA | 99.215 | 1783 | 3 | 4 | 1 | 1781 | 236959 | 235186 | 0 | 3205 |
| ptDNA | mtDNA | 98.36 | 1707 | 1 | 3 | 150128 | 151833 | 238640 | 236960 | 0 | 2972 |
| ptDNA | mtDNA | 94.987 | 1855 | 10 | 14 | 11896 | 13733 | 108580 | 110368 | 0 | 2833 |
| ptDNA | mtDNA | 99.487 | 1559 | 0 | 4 | 127008 | 128564 | 392563 | 391011 | 0 | 2828 |
| ptDNA | mtDNA | 94.301 | 1737 | 44 | 10 | 27422 | 29158 | 273998 | 275679 | 0 | 2608 |
| ptDNA | mtDNA | 94.301 | 1737 | 44 | 10 | 27422 | 29158 | 352881 | 354562 | 0 | 2608 |
| ptDNA | mtDNA | 98.116 | 1486 | 2 | 3 | 95837 | 97322 | 418183 | 416724 | 0 | 2566 |
| ptDNA | mtDNA | 98.116 | 1486 | 2 | 3 | 67472 | 68957 | 416724 | 418183 | 0 | 2566 |
| ptDNA | mtDNA | 92.63 | 1601 | 4 | 10 | 61196 | 62796 | 491750 | 490264 | 0 | 2198 |
| ptDNA | mtDNA | 92.63 | 1601 | 4 | 10 | 101998 | 103598 | 490264 | 491750 | 0 | 2198 |
| ptDNA | mtDNA | 97.237 | 1303 | 1 | 5 | 48266 | 49568 | 457277 | 456010 | 0 | 2174 |
| ptDNA | mtDNA | 97.237 | 1303 | 1 | 5 | 115226 | 116528 | 456010 | 457277 | 0 | 2174 |
| ptDNA | mtDNA | 95.899 | 1341 | 1 | 11 | 14448 | 15788 | 382843 | 384129 | 0 | 2122 |
| ptDNA | mtDNA | 96.29 | 1240 | 4 | 6 | 123922 | 125153 | 284908 | 286113 | 0 | 1997 |
| ptDNA | mtDNA | 96.29 | 1240 | 4 | 6 | 123922 | 125153 | 363791 | 364996 | 0 | 1997 |
| ptDNA | mtDNA | 97.856 | 1166 | 2 | 4 | 58498 | 59662 | 428973 | 427830 | 0 | 1993 |
| ptDNA | mtDNA | 97.856 | 1166 | 2 | 4 | 105132 | 106296 | 427830 | 428973 | 0 | 1993 |
| ptDNA | mtDNA | 98.894 | 1085 | 4 | 2 | 46336 | 47420 | 183816 | 184892 | 0 | 1930 |
| ptDNA | mtDNA | 99.796 | 981 | 2 | 0 | 109585 | 110565 | 103244 | 102264 | 0 | 1801 |
| ptDNA | mtDNA | 99.796 | 981 | 2 | 0 | 54229 | 55209 | 102264 | 103244 | 0 | 1801 |
| ptDNA | mtDNA | 99.49 | 784 | 4 | 0 | 36328 | 37111 | 435159 | 434376 | 0 | 1426 |
| ptDNA | mtDNA | 94.378 | 836 | 0 | 8 | 63822 | 64657 | 489645 | 488857 | 0 | 1240 |
| ptDNA | mtDNA | 94.378 | 836 | 0 | 8 | 100137 | 100972 | 488857 | 489645 | 0 | 1240 |
| ptDNA | mtDNA | 98.271 | 694 | 11 | 1 | 132627 | 133319 | 28212 | 27519 | 0 | 1214 |
| ptDNA | mtDNA | 95.565 | 744 | 1 | 3 | 91513 | 92256 | 216015 | 215304 | 0 | 1162 |
| ptDNA | mtDNA | 95.565 | 744 | 1 | 3 | 72538 | 73281 | 215304 | 216015 | 0 | 1162 |
| ptDNA | mtDNA | 96.833 | 663 | 6 | 2 | 26141 | 26803 | 199999 | 199352 | 0 | 1094 |
| ptDNA | mtDNA | 96.218 | 661 | 7 | 3 | 63008 | 63668 | 490274 | 489632 | 0 | 1066 |
| ptDNA | mtDNA | 96.218 | 661 | 7 | 3 | 101126 | 101786 | 489632 | 490274 | 0 | 1066 |
| ptDNA | mtDNA | 98.492 | 597 | 2 | 2 | 34883 | 35472 | 453916 | 453320 | 0 | 1046 |
| ptDNA | mtDNA | 95.534 | 627 | 7 | 4 | 82354 | 82975 | 77204 | 77814 | 0 | 983 |
| ptDNA | mtDNA | 94.118 | 663 | 4 | 5 | 29869 | 30531 | 176128 | 176755 | 0 | 976 |
| ptDNA | mtDNA | 94.118 | 663 | 4 | 5 | 29869 | 30531 | 474703 | 474076 | 0 | 976 |
| ptDNA | mtDNA | 93.146 | 642 | 4 | 4 | 42943 | 43576 | 124509 | 125118 | 0 | 905 |
| ptDNA | mtDNA | 95.486 | 576 | 10 | 6 | 133343 | 133917 | 181625 | 182185 | 0 | 905 |
| ptDNA | mtDNA | 95.797 | 571 | 2 | 1 | 114662 | 115232 | 80564 | 80016 | 0 | 902 |
| ptDNA | mtDNA | 95.797 | 571 | 2 | 1 | 49562 | 50132 | 80016 | 80564 | 0 | 902 |
| ptDNA | mtDNA | 99.576 | 472 | 2 | 0 | 142138 | 142609 | 16211 | 15740 | 0 | 861 |
| ptDNA | mtDNA | 96.566 | 495 | 1 | 2 | 10232 | 10726 | 105486 | 105964 | 0 | 806 |
| ptDNA | mtDNA | 99.522 | 418 | 2 | 0 | 137978 | 138395 | 379349 | 378932 | 0 | 761 |
| ptDNA | mtDNA | 95.445 | 483 | 9 | 2 | 9007 | 9476 | 224782 | 225264 | 0 | 758 |
| ptDNA | mtDNA | 95.064 | 466 | 3 | 1 | 35856 | 36321 | 453332 | 452887 | 0 | 715 |
| ptDNA | mtDNA | 97.462 | 394 | 3 | 1 | 138561 | 138954 | 378941 | 378555 | 0 | 665 |
| ptDNA | mtDNA | 97.927 | 386 | 3 | 4 | 11463 | 11848 | 11861 | 12241 | 0 | 664 |
| ptDNA | mtDNA | 97.772 | 359 | 0 | 2 | 45698 | 46056 | 183482 | 183832 | 3.46E-174 | 612 |
| ptDNA | mtDNA | 92.462 | 398 | 4 | 5 | 116994 | 117391 | 6719 | 6348 | 3.56E-154 | 545 |
| ptDNA | mtDNA | 95.198 | 354 | 0 | 2 | 43801 | 44154 | 220171 | 219835 | 1.28E-153 | 544 |
| ptDNA | mtDNA | 98.976 | 293 | 0 | 3 | 127008 | 127298 | 69445 | 69736 | 5.99E-147 | 521 |
| ptDNA | mtDNA | 99.578 | 237 | 0 | 1 | 50426 | 50662 | 280249 | 280014 | 1.04E-119 | 431 |
| ptDNA | mtDNA | 99.578 | 237 | 0 | 1 | 114132 | 114368 | 280014 | 280249 | 1.04E-119 | 431 |
| ptDNA | mtDNA | 99.578 | 237 | 0 | 1 | 50426 | 50662 | 359132 | 358897 | 1.04E-119 | 431 |
| ptDNA | mtDNA | 99.578 | 237 | 0 | 1 | 114132 | 114368 | 358897 | 359132 | 1.04E-119 | 431 |
| ptDNA | mtDNA | 96.552 | 261 | 1 | 1 | 38316 | 38576 | 47493 | 47241 | 4.83E-118 | 425 |
| ptDNA | mtDNA | 98.347 | 242 | 4 | 0 | 85580 | 85821 | 57773 | 58014 | 4.83E-118 | 425 |
| ptDNA | mtDNA | 92.308 | 299 | 2 | 4 | 79523 | 79820 | 297936 | 297658 | 6.30E-112 | 405 |
| ptDNA | mtDNA | 92.308 | 299 | 2 | 4 | 79523 | 79820 | 376819 | 376541 | 6.30E-112 | 405 |
| ptDNA | mtDNA | 93.214 | 280 | 1 | 3 | 37925 | 38204 | 112524 | 112785 | 3.79E-109 | 396 |
| ptDNA | mtDNA | 94.422 | 251 | 3 | 1 | 133919 | 134169 | 147514 | 147753 | 4.94E-103 | 375 |
| ptDNA | mtDNA | 98.515 | 202 | 0 | 2 | 109390 | 109591 | 103403 | 103205 | 2.31E-96 | 353 |
| ptDNA | mtDNA | 98.515 | 202 | 0 | 2 | 55203 | 55404 | 103205 | 103403 | 2.31E-96 | 353 |
| ptDNA | mtDNA | 91.77 | 243 | 16 | 2 | 80911 | 81150 | 33805 | 34046 | 8.38E-91 | 335 |
| ptDNA | mtDNA | 100 | 160 | 0 | 0 | 54061 | 54220 | 113863 | 113704 | 3.95E-79 | 296 |
| ptDNA | mtDNA | 100 | 160 | 0 | 0 | 110574 | 110733 | 113704 | 113863 | 3.95E-79 | 296 |
| ptDNA | mtDNA | 94.792 | 192 | 1 | 1 | 122985 | 123176 | 162224 | 162406 | 1.84E-77 | 291 |
| ptDNA | mtDNA | 98.765 | 162 | 2 | 0 | 27179 | 27340 | 272748 | 272909 | 6.62E-77 | 289 |
| ptDNA | mtDNA | 98.765 | 162 | 2 | 0 | 27179 | 27340 | 351631 | 351792 | 6.62E-77 | 289 |
| ptDNA | mtDNA | 99.367 | 158 | 1 | 0 | 91208 | 91365 | 216171 | 216014 | 2.38E-76 | 287 |
| ptDNA | mtDNA | 99.367 | 158 | 1 | 0 | 73429 | 73586 | 216014 | 216171 | 2.38E-76 | 287 |
| ptDNA | mtDNA | 93.548 | 186 | 2 | 2 | 129894 | 130079 | 391023 | 390848 | 8.62E-71 | 268 |
| ptDNA | mtDNA | 98.658 | 149 | 2 | 0 | 37260 | 37408 | 434375 | 434227 | 1.12E-69 | 265 |
| ptDNA | mtDNA | 95.706 | 163 | 2 | 1 | 53931 | 54093 | 284912 | 284755 | 1.87E-67 | 257 |
| ptDNA | mtDNA | 95.706 | 163 | 2 | 1 | 110701 | 110863 | 284755 | 284912 | 1.87E-67 | 257 |
| ptDNA | mtDNA | 95.706 | 163 | 2 | 1 | 53931 | 54093 | 363795 | 363638 | 1.87E-67 | 257 |
| ptDNA | mtDNA | 95.706 | 163 | 2 | 1 | 110701 | 110863 | 363638 | 363795 | 1.87E-67 | 257 |
| ptDNA | mtDNA | 94.012 | 167 | 5 | 1 | 65407 | 65573 | 404372 | 404211 | 1.12E-64 | 248 |
| ptDNA | mtDNA | 94.012 | 167 | 5 | 1 | 99221 | 99387 | 404211 | 404372 | 1.12E-64 | 248 |
| ptDNA | mtDNA | 94 | 150 | 0 | 1 | 79381 | 79530 | 297617 | 297477 | 8.81E-56 | 219 |
| ptDNA | mtDNA | 94 | 150 | 0 | 1 | 79381 | 79530 | 376500 | 376360 | 8.81E-56 | 219 |
| ptDNA | mtDNA | 76.008 | 471 | 84 | 20 | 99754 | 100214 | 18159 | 17708 | 3.17E-55 | 217 |
| ptDNA | mtDNA | 76.008 | 471 | 84 | 20 | 64580 | 65040 | 17708 | 18159 | 3.17E-55 | 217 |
| ptDNA | mtDNA | 75.381 | 459 | 101 | 11 | 37166 | 37618 | 231516 | 231064 | 1.47E-53 | 211 |
| ptDNA | mtDNA | 92.617 | 149 | 5 | 2 | 89127 | 89275 | 101871 | 102013 | 5.30E-53 | 209 |
| ptDNA | mtDNA | 94.845 | 97 | 4 | 1 | 47688 | 47783 | 13248 | 13344 | 3.26E-35 | 150 |
| ptDNA | mtDNA | 81.707 | 164 | 30 | 0 | 100454 | 100617 | 17437 | 17274 | 2.54E-31 | 137 |
| ptDNA | mtDNA | 81.707 | 164 | 30 | 0 | 64177 | 64340 | 17274 | 17437 | 2.54E-31 | 137 |
| ptDNA | mtDNA | 97.436 | 78 | 2 | 0 | 16901 | 16978 | 305569 | 305492 | 3.28E-30 | 134 |
| ptDNA | mtDNA | 94.872 | 78 | 4 | 0 | 92591 | 92668 | 390093 | 390016 | 7.10E-27 | 122 |
| ptDNA | mtDNA | 94.872 | 78 | 4 | 0 | 72126 | 72203 | 390016 | 390093 | 7.10E-27 | 122 |
| ptDNA | mtDNA | 93.75 | 80 | 5 | 0 | 147865 | 147944 | 283624 | 283703 | 2.55E-26 | 121 |
| ptDNA | mtDNA | 93.75 | 80 | 5 | 0 | 147865 | 147944 | 362507 | 362586 | 2.55E-26 | 121 |
| ptDNA | mtDNA | 97.143 | 70 | 2 | 0 | 130899 | 130968 | 494974 | 494905 | 9.19E-26 | 119 |
| ptDNA | mtDNA | 100 | 63 | 0 | 0 | 69151 | 69213 | 384182 | 384120 | 3.30E-25 | 117 |
| ptDNA | mtDNA | 100 | 63 | 0 | 0 | 95581 | 95643 | 384120 | 384182 | 3.30E-25 | 117 |
| ptDNA | mtDNA | 93.421 | 76 | 2 | 2 | 134349 | 134423 | 51647 | 51574 | 5.53E-23 | 110 |
| ptDNA | mtDNA | 98.113 | 53 | 0 | 1 | 19169 | 19221 | 13786 | 13735 | 2.00E-17 | 91.6 |
| ptDNA | mtDNA | 98.077 | 52 | 1 | 0 | 122042 | 122093 | 123527 | 123578 | 2.00E-17 | 91.6 |
| ptDNA | mtDNA | 97.959 | 49 | 1 | 0 | 92407 | 92455 | 121546 | 121498 | 9.32E-16 | 86.1 |
| ptDNA | mtDNA | 97.959 | 49 | 1 | 0 | 72339 | 72387 | 121498 | 121546 | 9.32E-16 | 86.1 |
| ptDNA | mtDNA | 100 | 41 | 0 | 0 | 83246 | 83286 | 490936 | 490896 | 5.61E-13 | 76.8 |
| ptDNA | mtDNA | 100 | 37 | 0 | 0 | 109176 | 109212 | 210695 | 210659 | 9.38E-11 | 69.4 |
| ptDNA | mtDNA | 100 | 37 | 0 | 0 | 55582 | 55618 | 210659 | 210695 | 9.38E-11 | 69.4 |
| ptDNA | mtDNA | 100 | 35 | 0 | 0 | 95664 | 95698 | 418210 | 418176 | 1.21E-09 | 65.8 |
| ptDNA | mtDNA | 100 | 35 | 0 | 0 | 69096 | 69130 | 418176 | 418210 | 1.21E-09 | 65.8 |
